# Supplementary material for: Efficient Tandem Addition/Cyclization for Access to 2,4-Diarylquinazolines via Catalytic Carbopalladation of Nitriles
Source: PubMed Central journal article supplement (PMC6384746; doi:10.3390/molecules24030463), 2019-01-28
Supplement: molecules-24-00463-s001.pdf [file molecules-24-00463-s001.pdf]

## Supporting Information

### Efficient Tandem Addition/Cyclization for Access to 2,4-Diarylquinazolines via Catalytic Carbopalladation of Nitriles

Julin Gong, Kun Hu, Yetong Zhang, Yinlin Shao\*, Tianxing Cheng, Maolin Hu\* and Jiuxi Chen

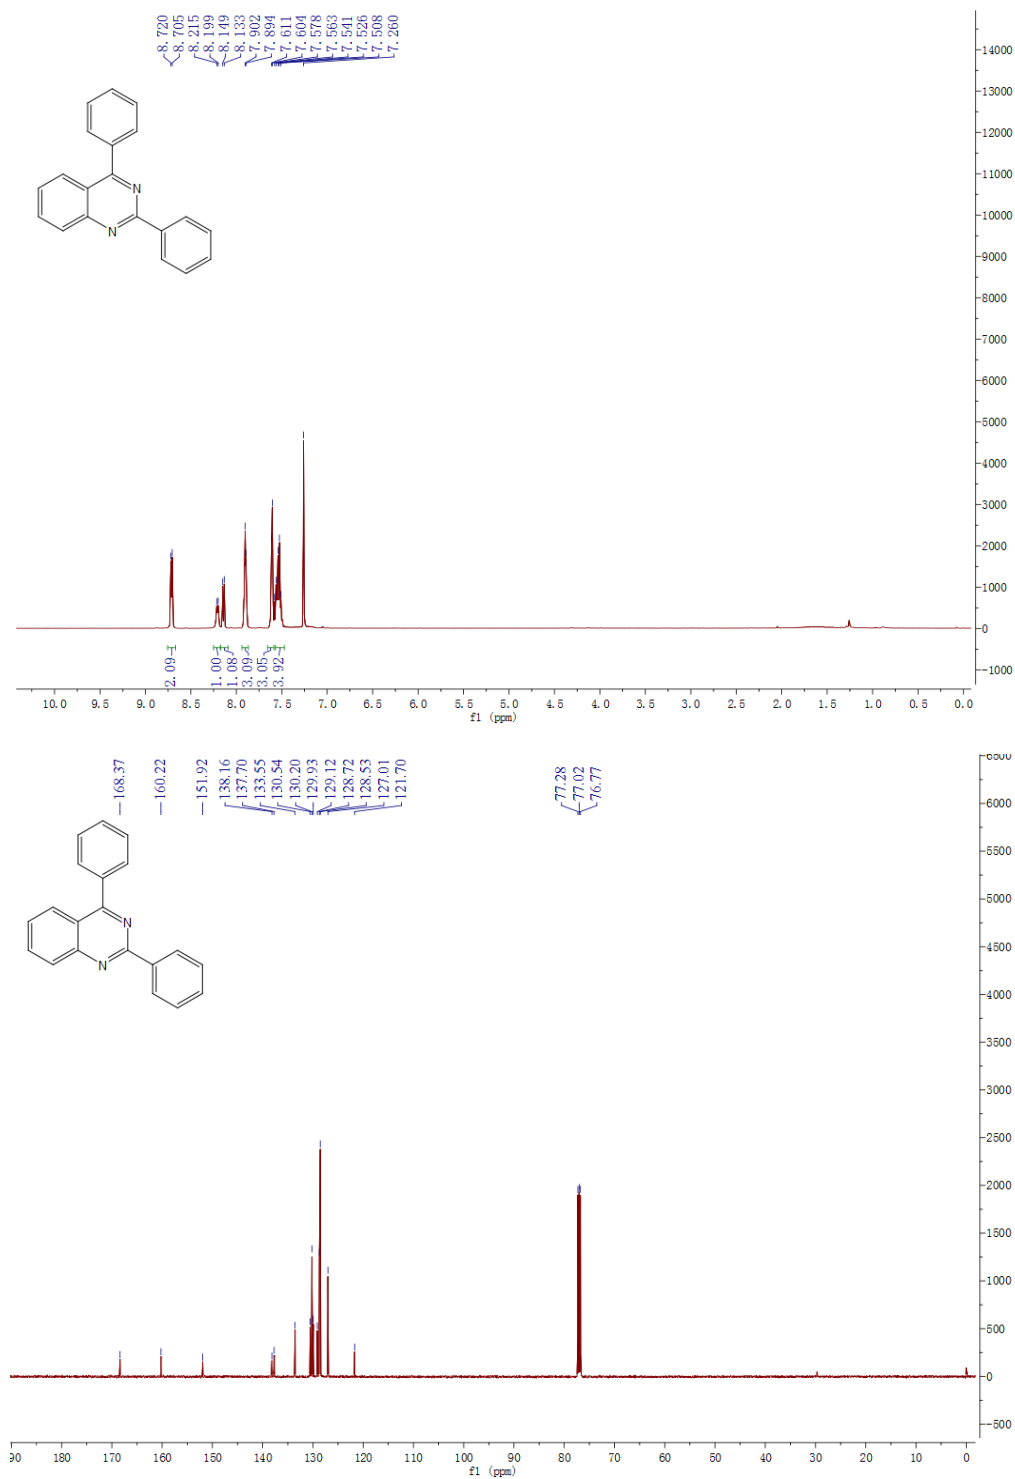

Figure S1. <sup>1</sup>H NMR of **3a** (500 MHz, CDCl<sub>3</sub>) and <sup>13</sup>C NMR of **3a** (125 MHz, CDCl<sub>3</sub>).

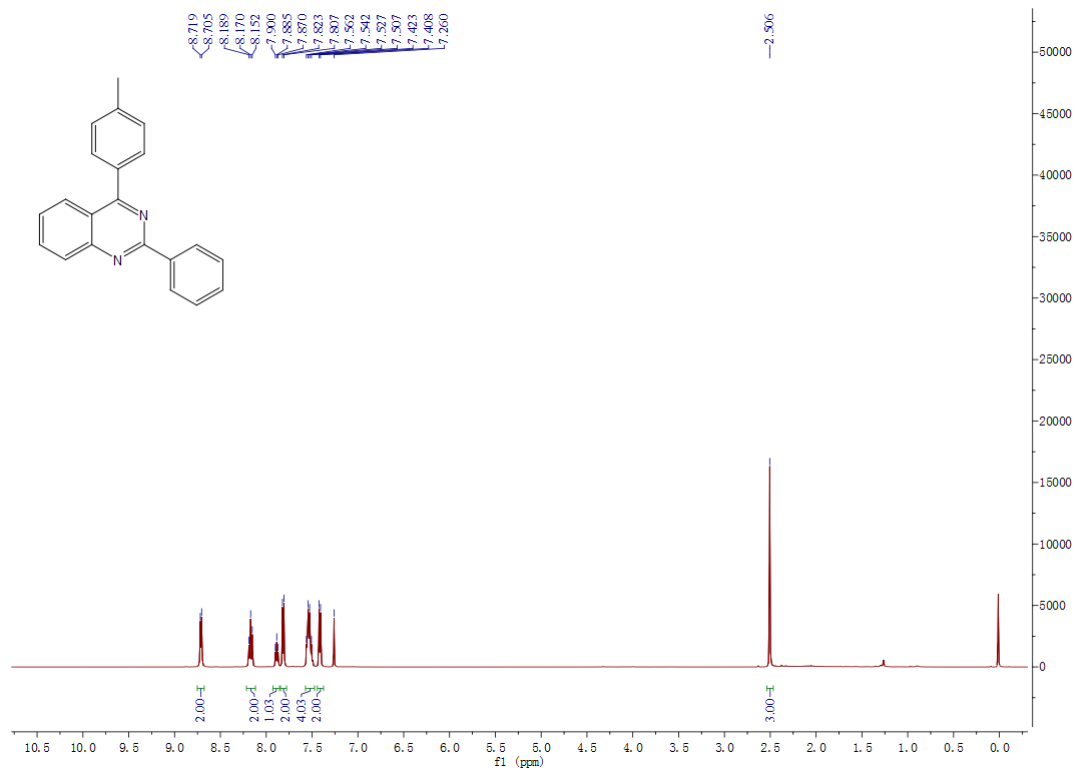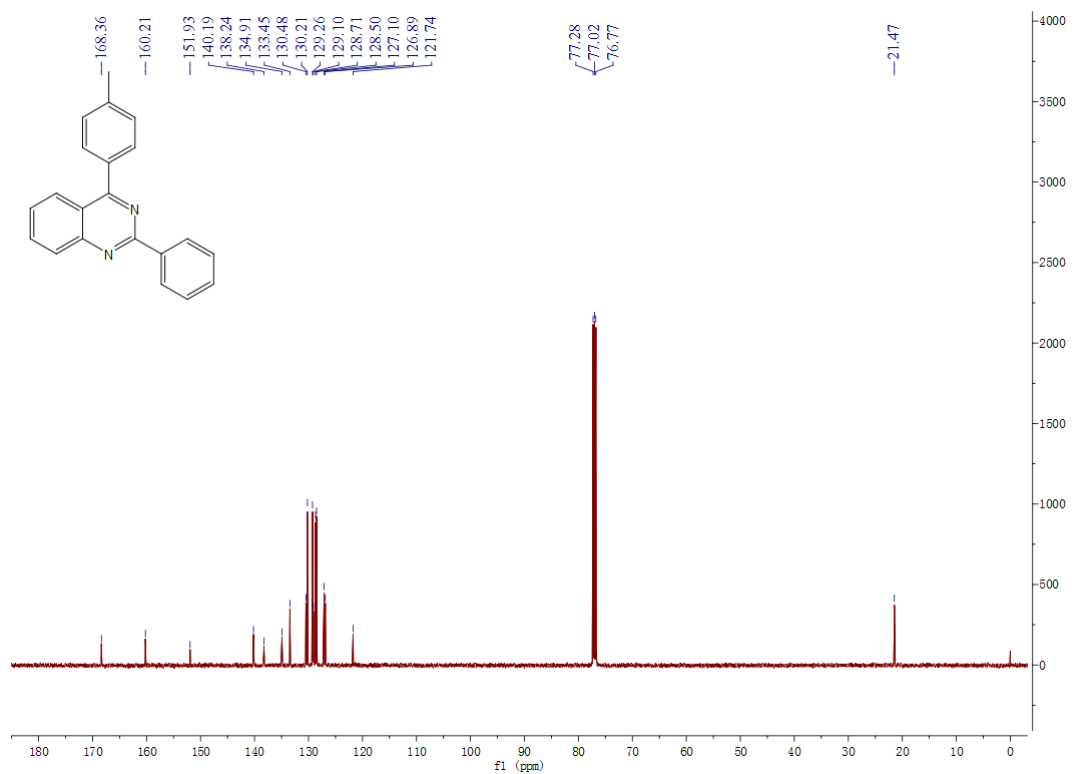

**Figure S2.** <sup>1</sup>H NMR of **3b** (500 MHz, CDCl<sub>3</sub>) and <sup>13</sup>C NMR of **3b** (125 MHz, CDCl<sub>3</sub>).

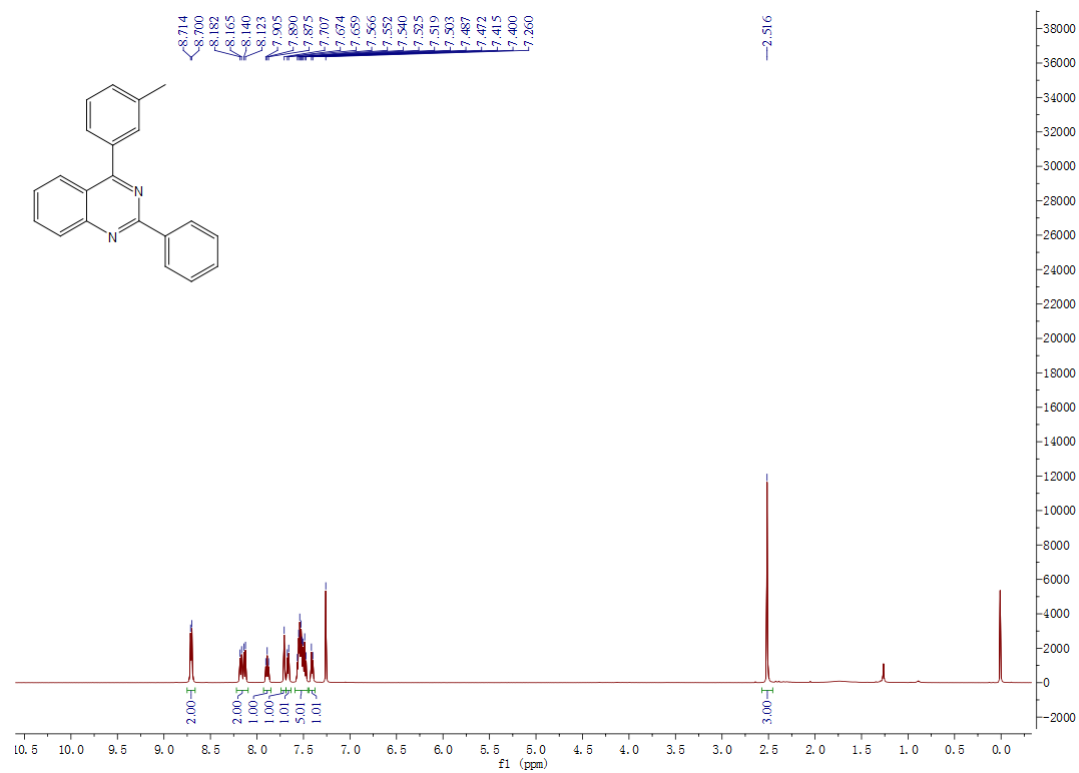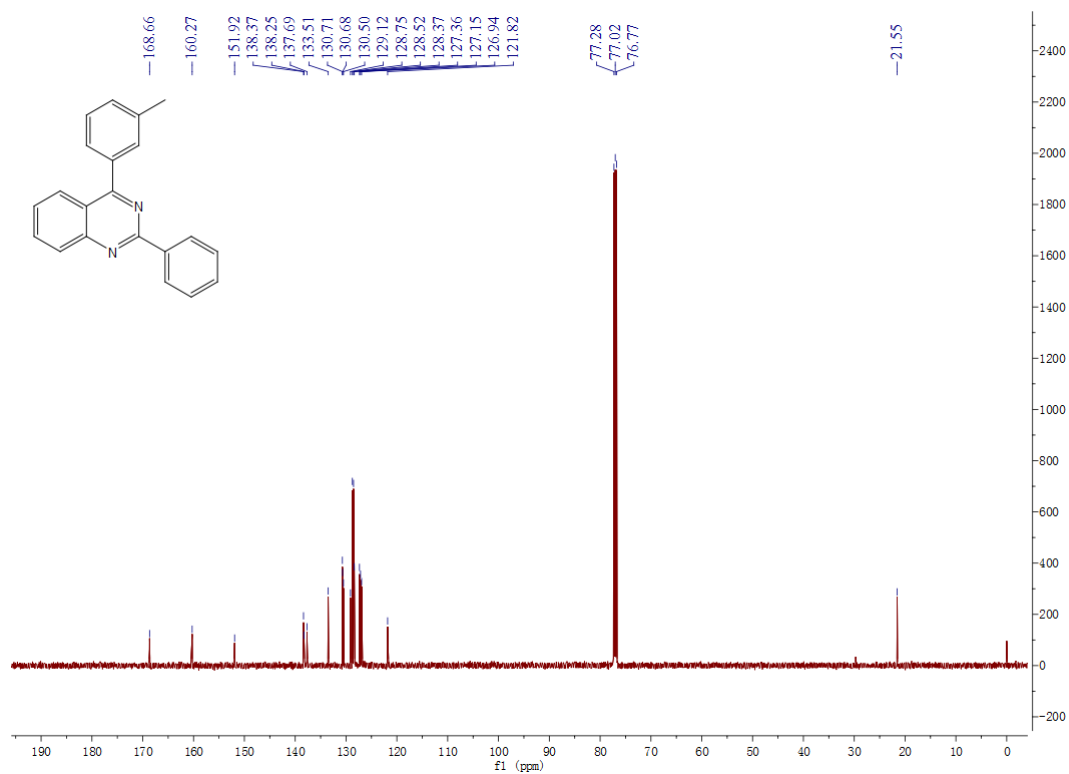

Figure S3. <sup>1</sup>H NMR of **3c** (500 MHz, CDCl<sub>3</sub>) and <sup>13</sup>C NMR of **3c** (125 MHz, CDCl<sub>3</sub>).

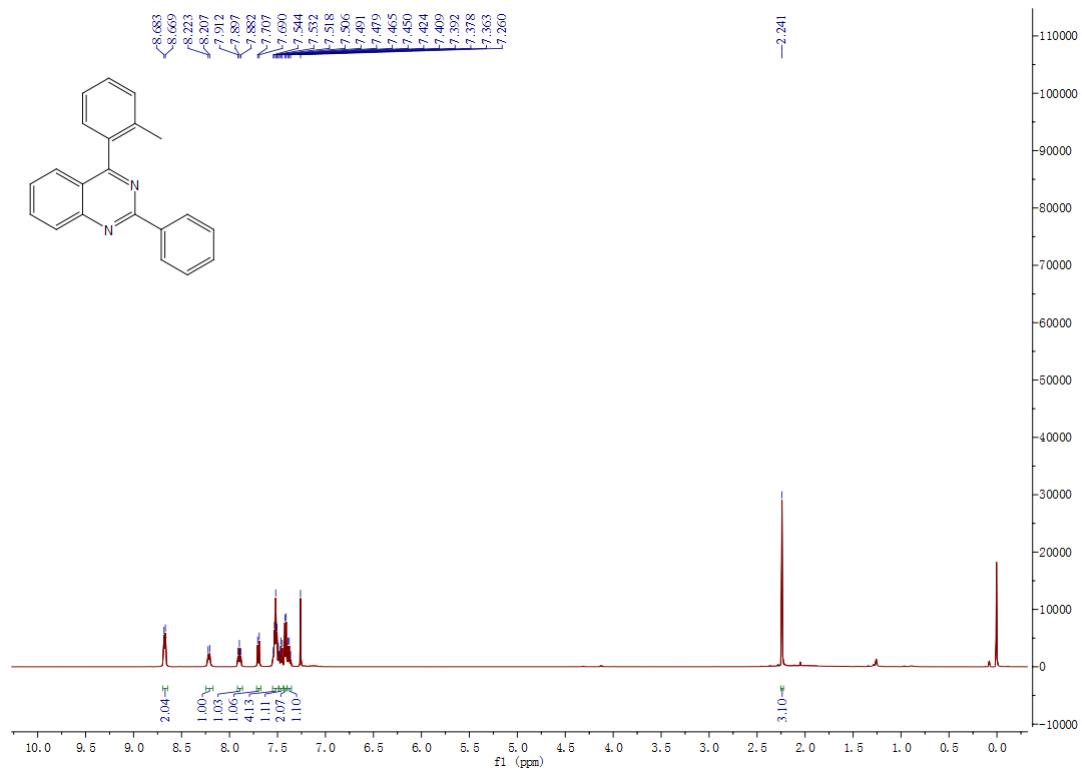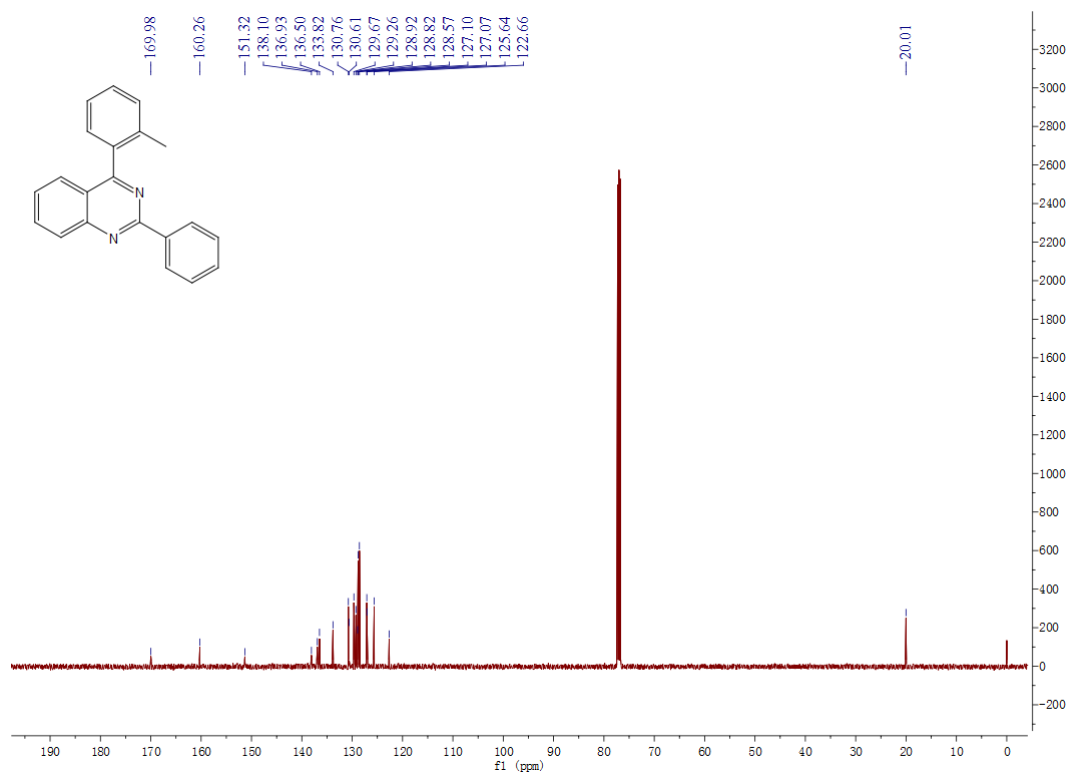

**Figure S4.** <sup>1</sup>H NMR of **3d** (500 MHz, CDCl<sub>3</sub>) and <sup>13</sup>C NMR of **3d** (125 MHz, CDCl<sub>3</sub>).

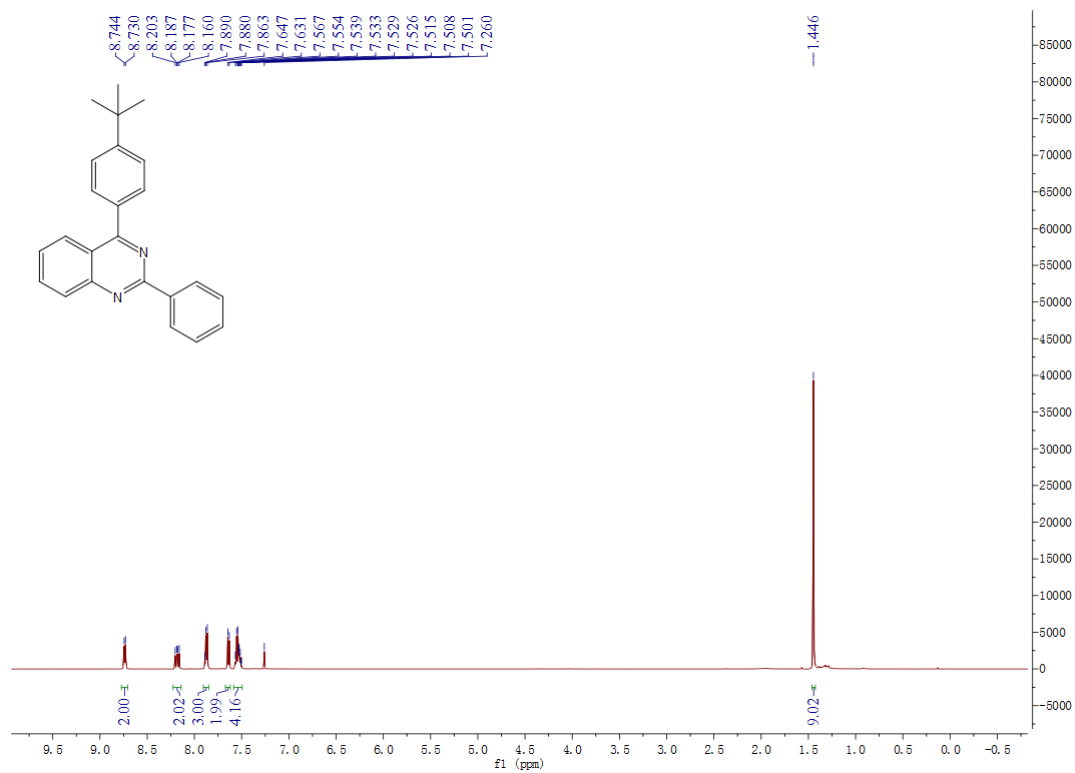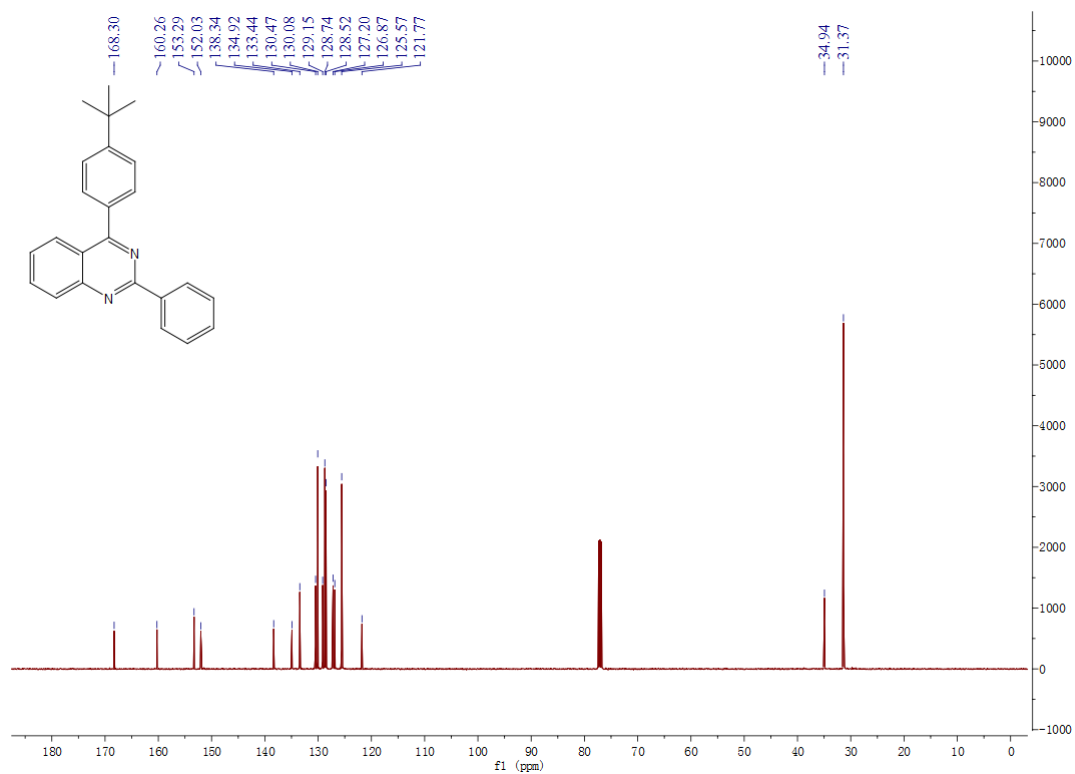

**Figure S5.** <sup>1</sup>H NMR of **3e** (500 MHz, CDCl<sub>3</sub>) and <sup>13</sup>C NMR of **3e** (125 MHz, CDCl<sub>3</sub>).

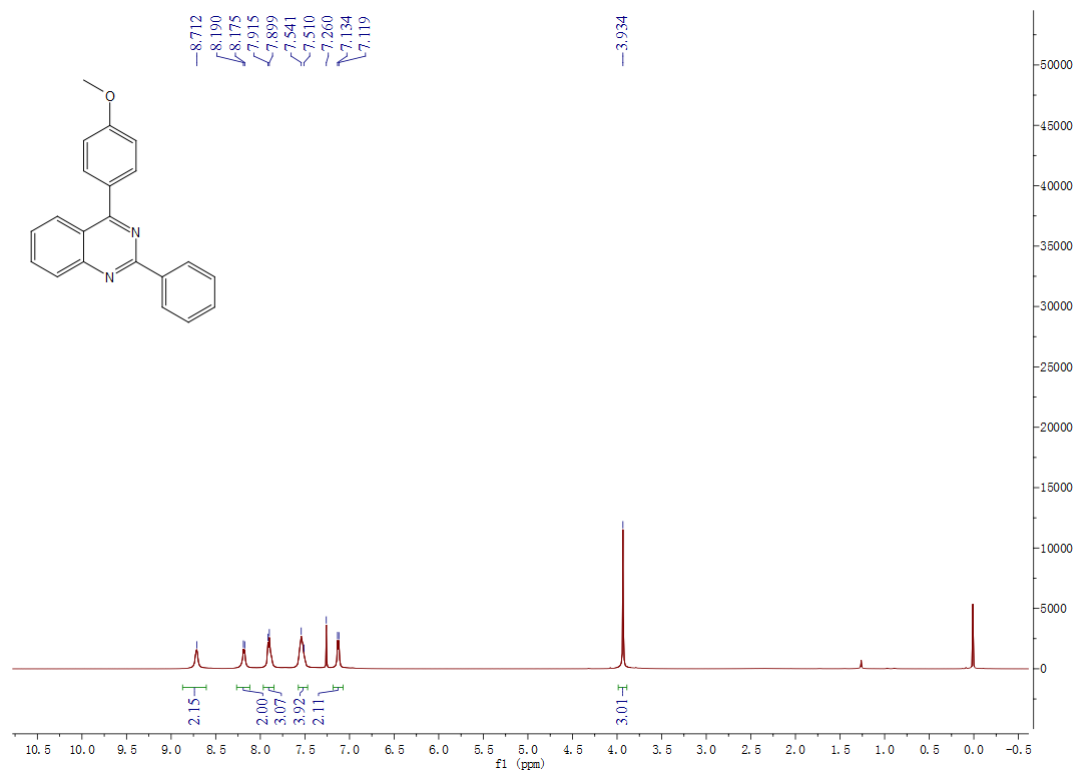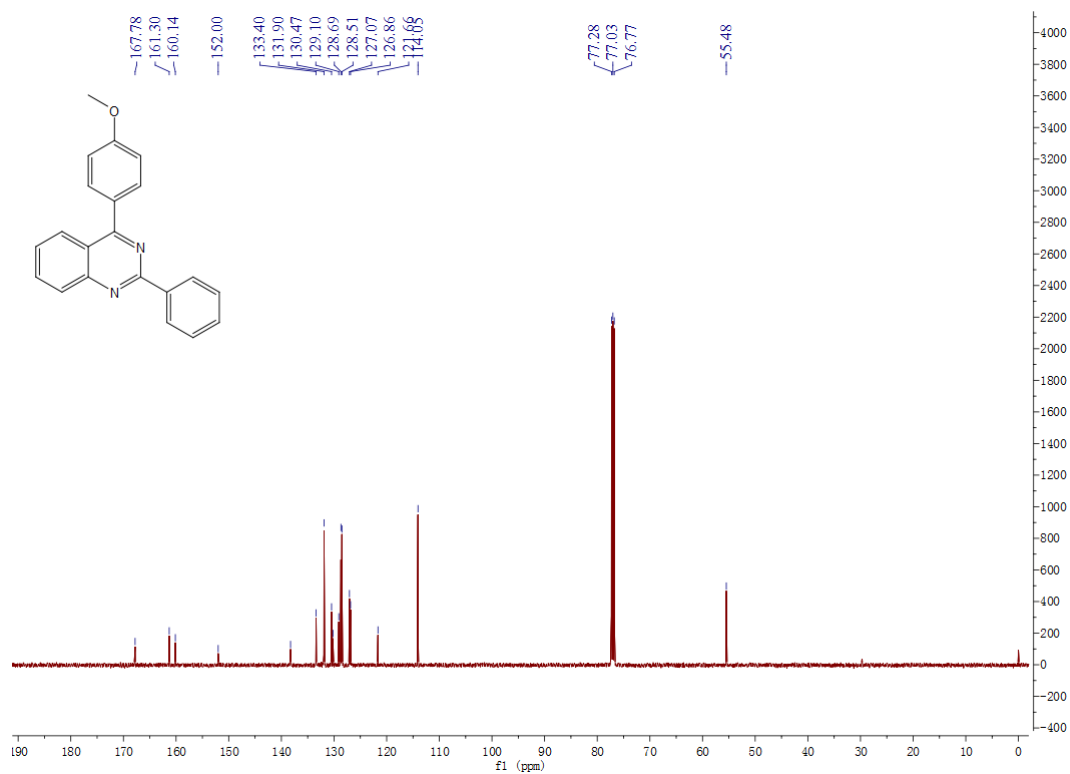

**Figure S6.** <sup>1</sup>H NMR of **3f** (500 MHz, CDCl<sub>3</sub>) and <sup>13</sup>C NMR of **3f** (125 MHz, CDCl<sub>3</sub>).

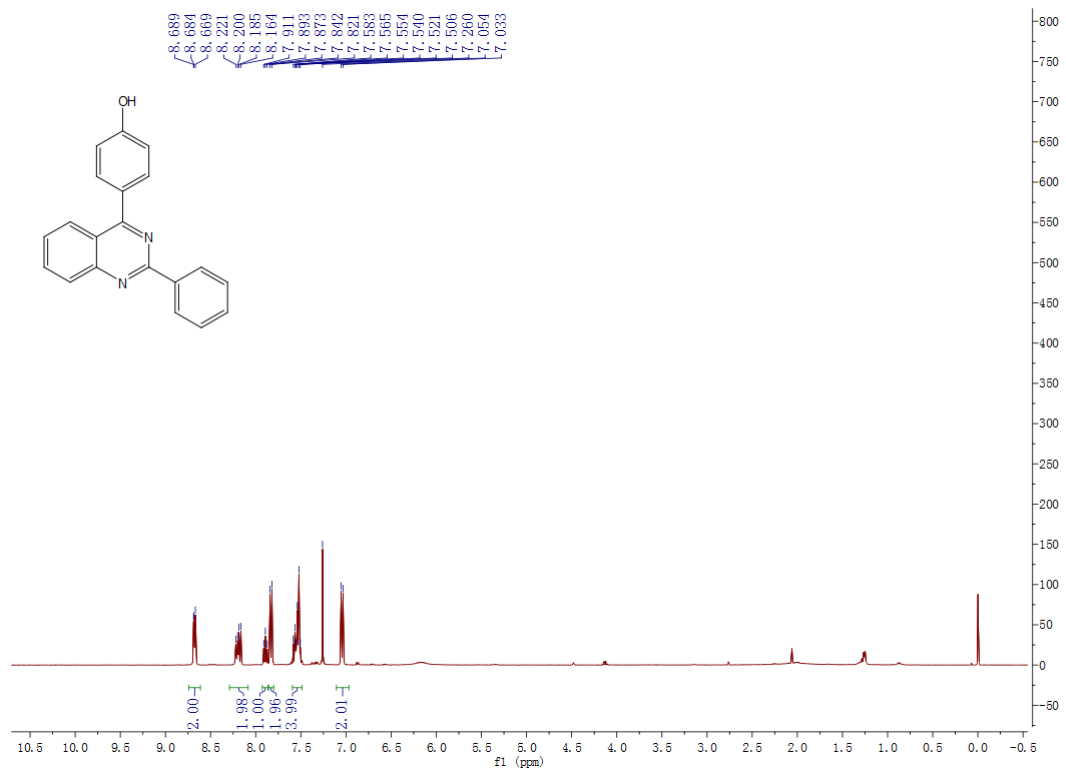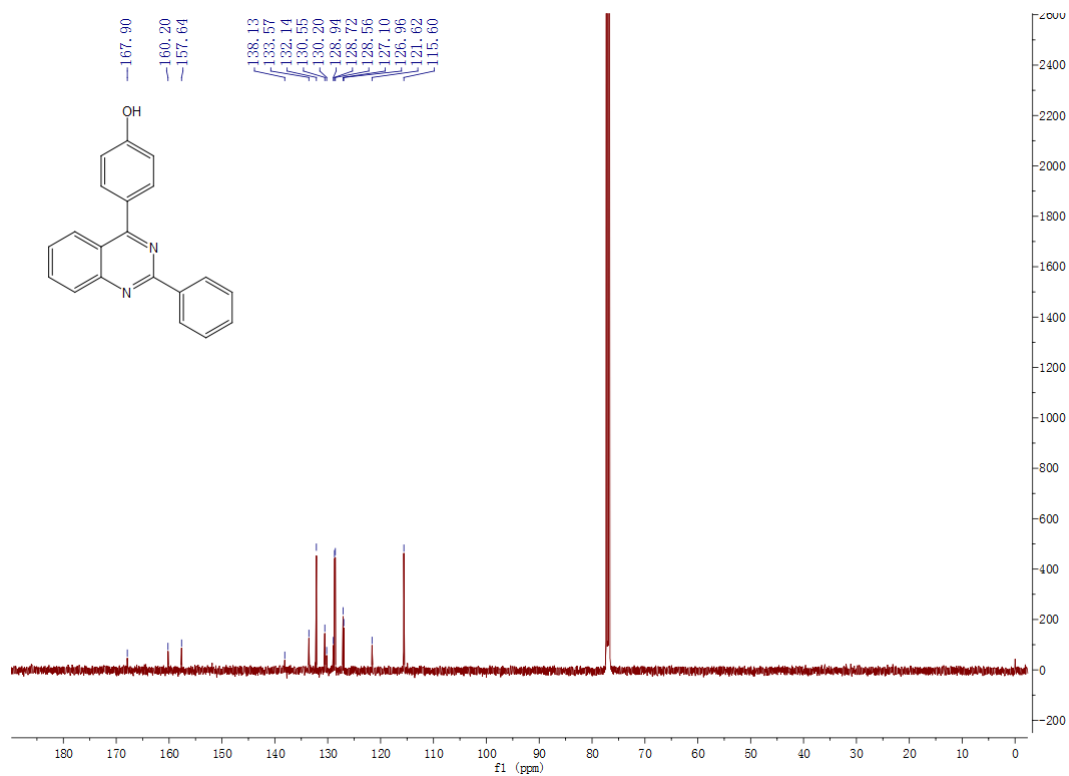

**Figure S7.** <sup>1</sup>H NMR of **3g** (500 MHz, CDCl<sub>3</sub>) and <sup>13</sup>C NMR of **3g** (125 MHz, CDCl<sub>3</sub>).

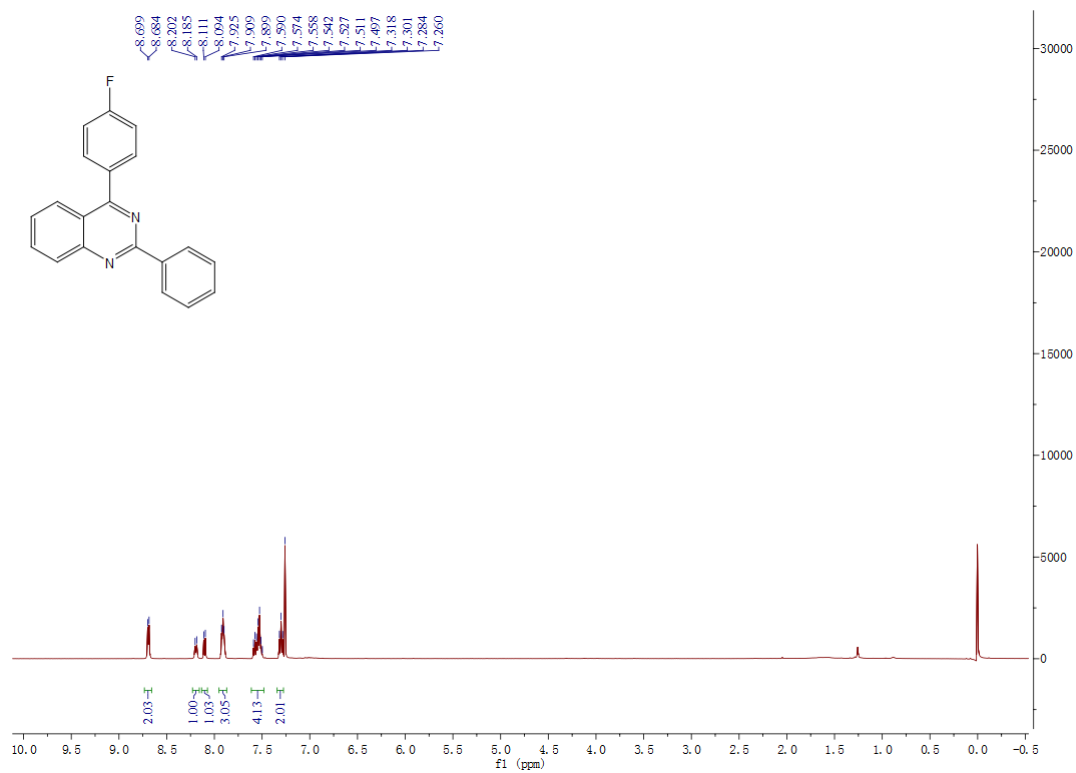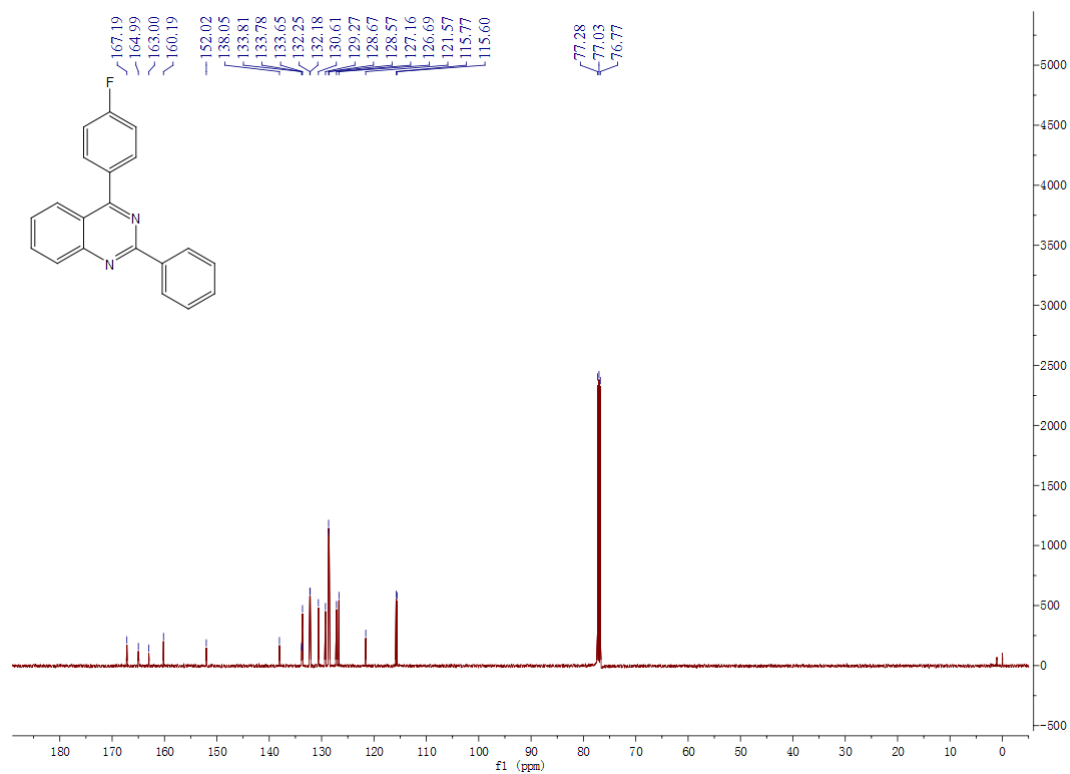

**Figure S8.** <sup>1</sup>H NMR of **3h** (500 MHz, CDCl<sub>3</sub>) and <sup>13</sup>C NMR of **3h** (125 MHz, CDCl<sub>3</sub>).



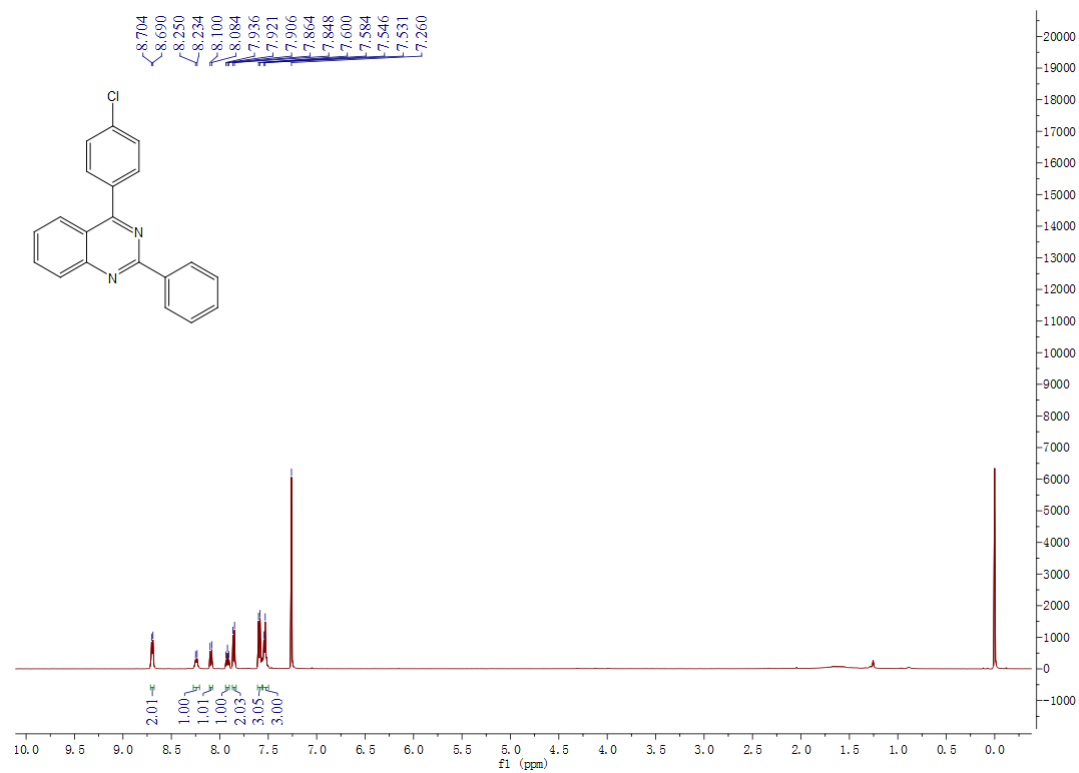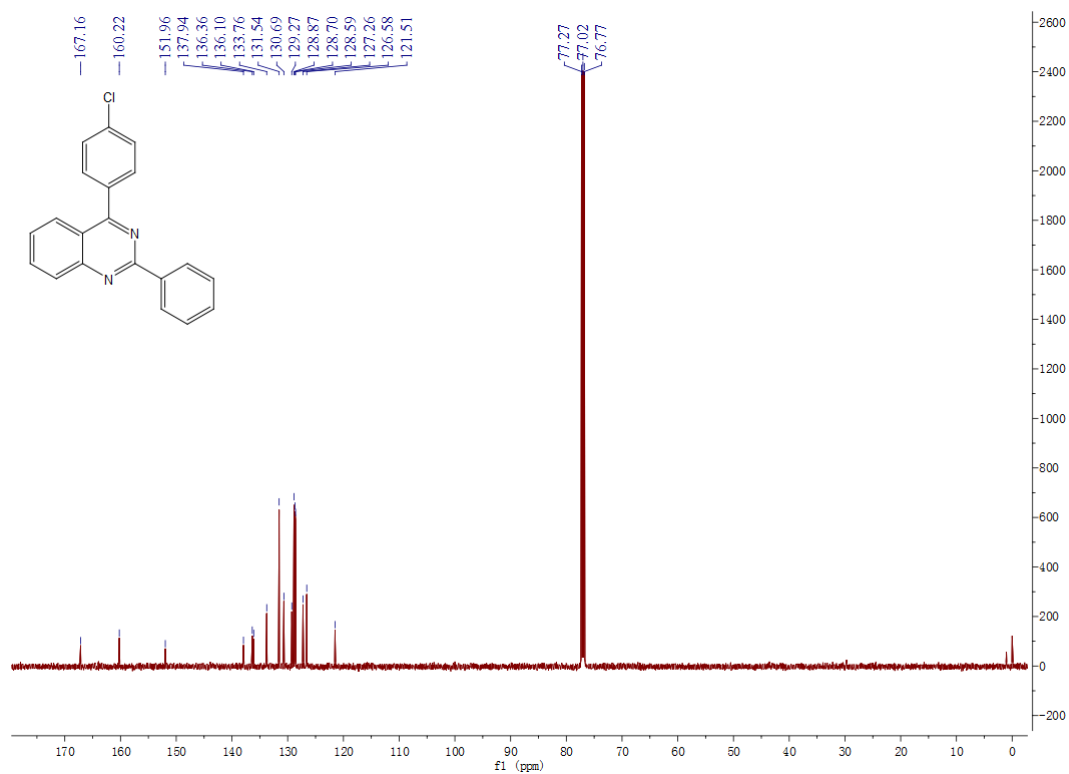

**Figure S9.** <sup>1</sup>H NMR of **3i** (500 MHz, CDCl<sub>3</sub>) and <sup>13</sup>C NMR of **3i** (125 MHz, CDCl<sub>3</sub>).

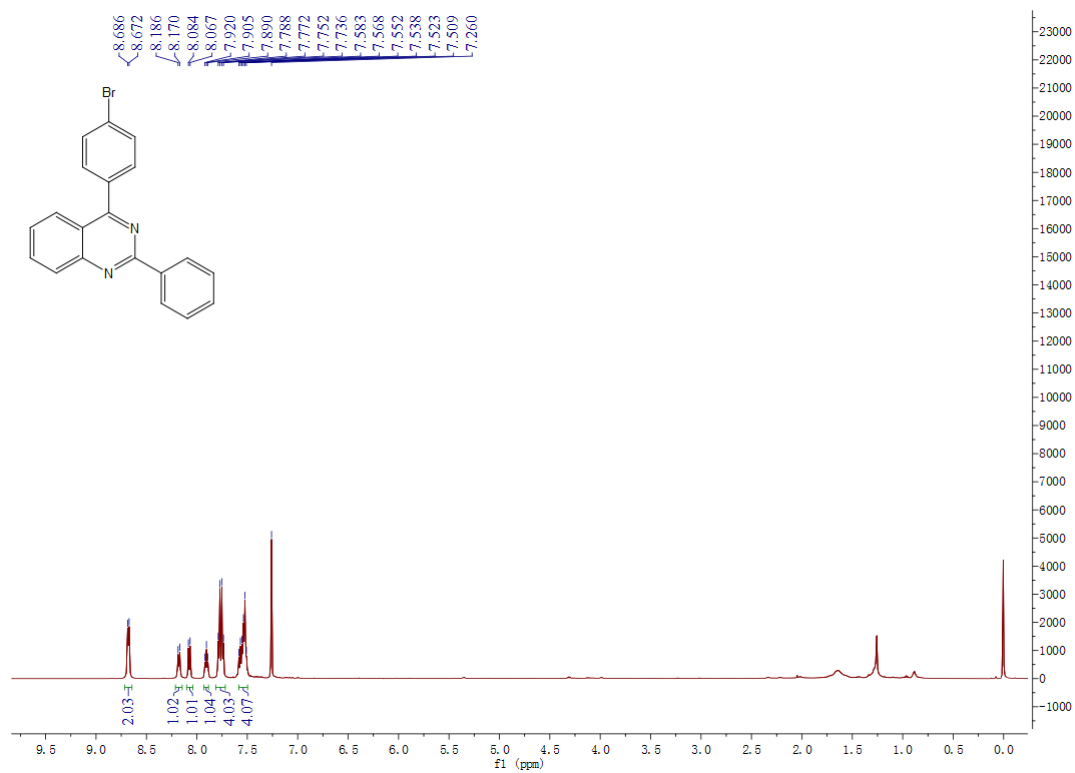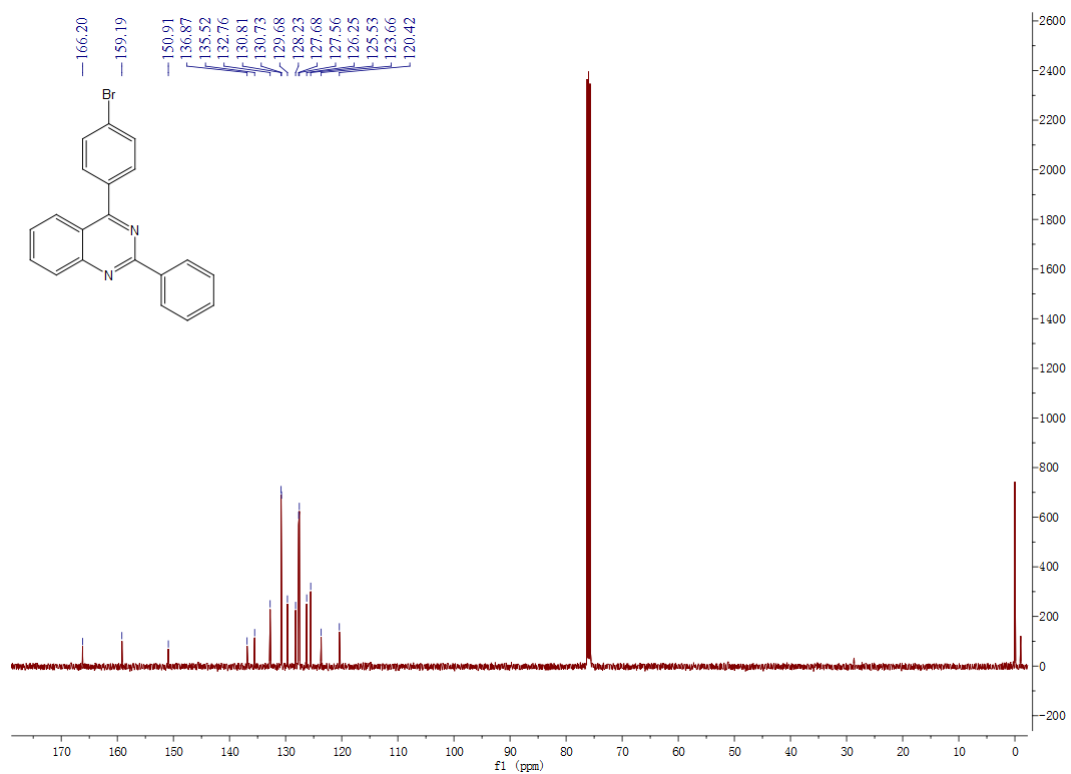

**Figure S10.** <sup>1</sup>H NMR of **3j** (500 MHz, CDCl<sub>3</sub>) and <sup>13</sup>C NMR of **3j** (125 MHz, CDCl<sub>3</sub>).

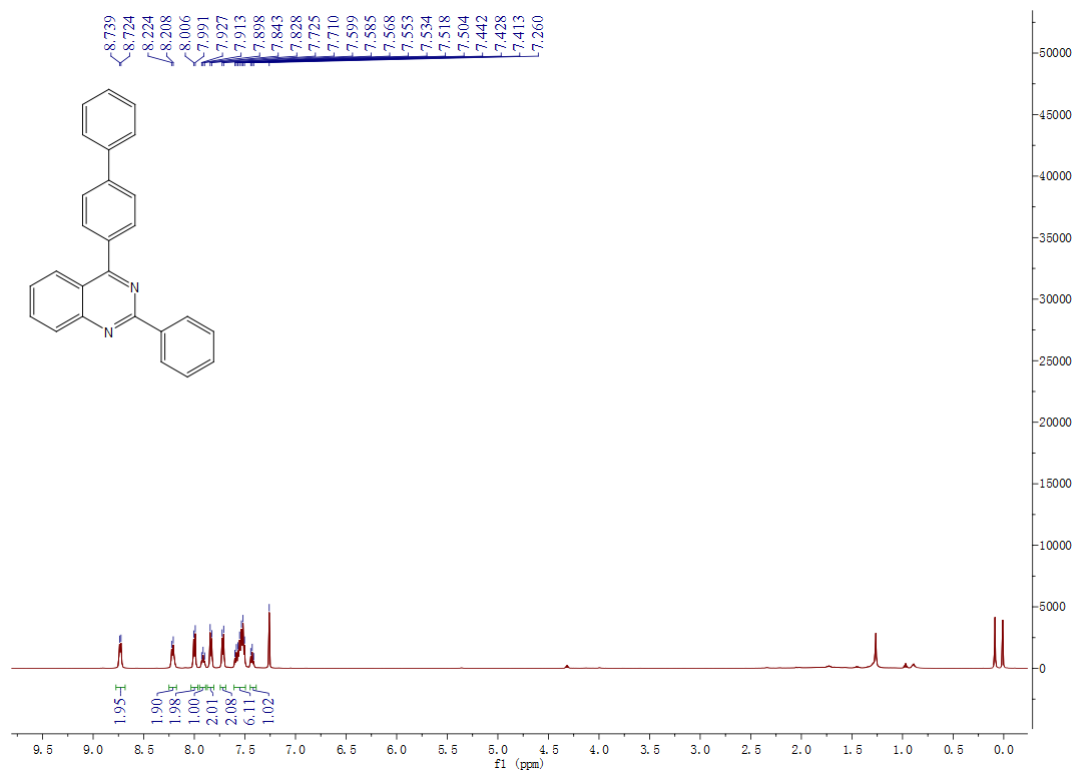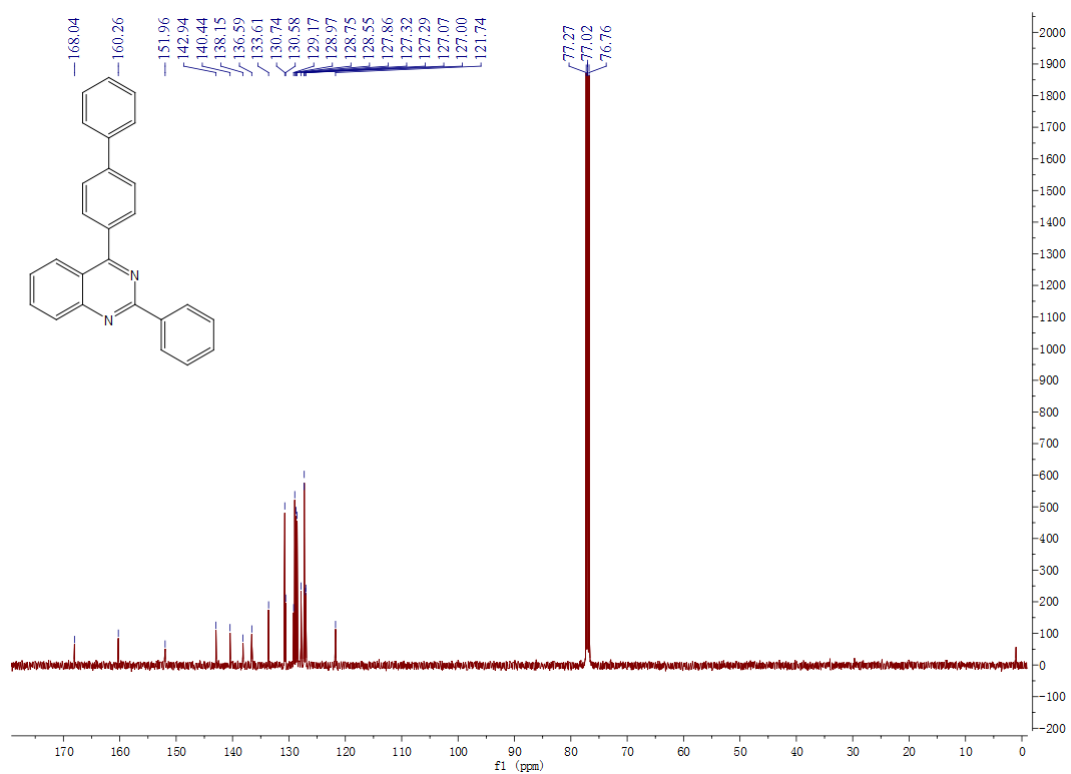

**Figure S11.** <sup>1</sup>H NMR of **31** (500 MHz, CDCl<sub>3</sub>) and <sup>13</sup>C NMR of **31** (125 MHz, CDCl<sub>3</sub>).

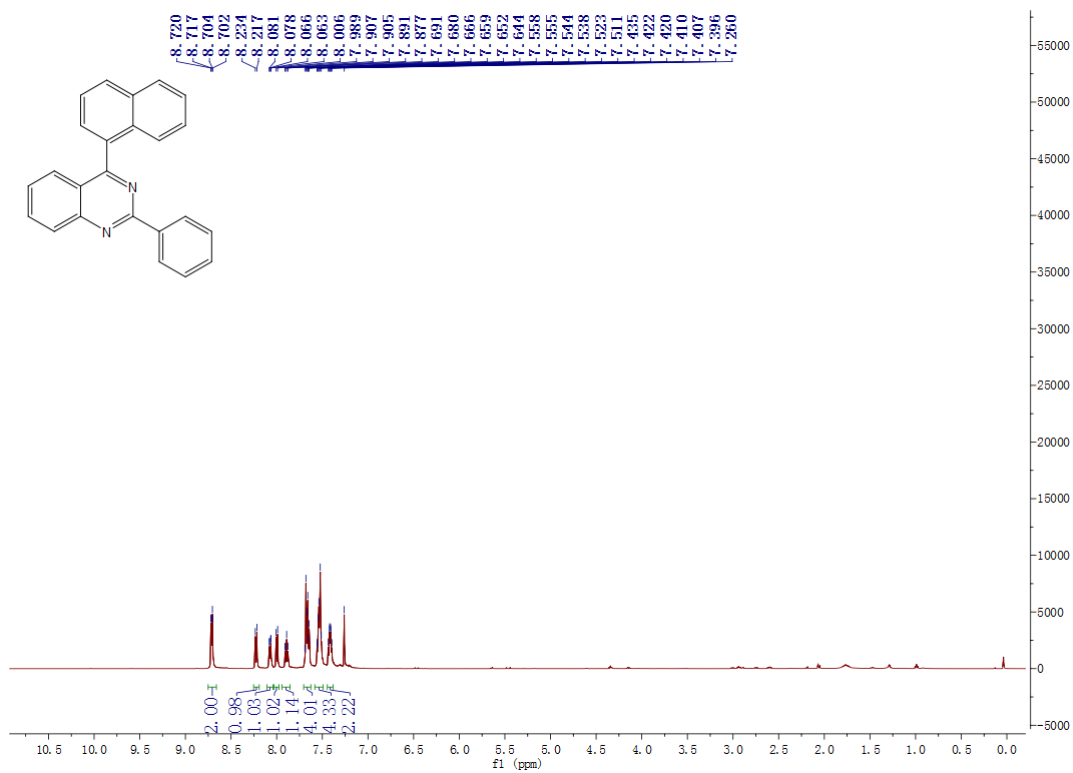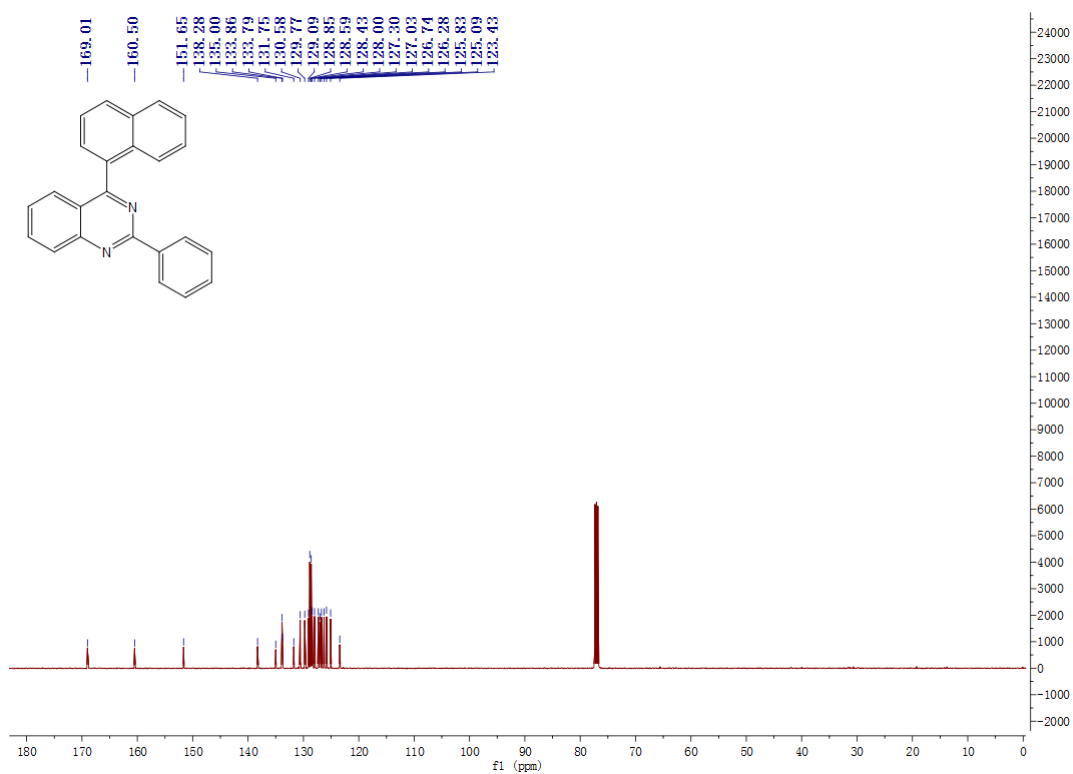

**Figure S12.** <sup>1</sup>H NMR of **3m** (500 MHz, CDCl<sub>3</sub>) and <sup>13</sup>C NMR of **3m** (125 MHz, CDCl<sub>3</sub>).

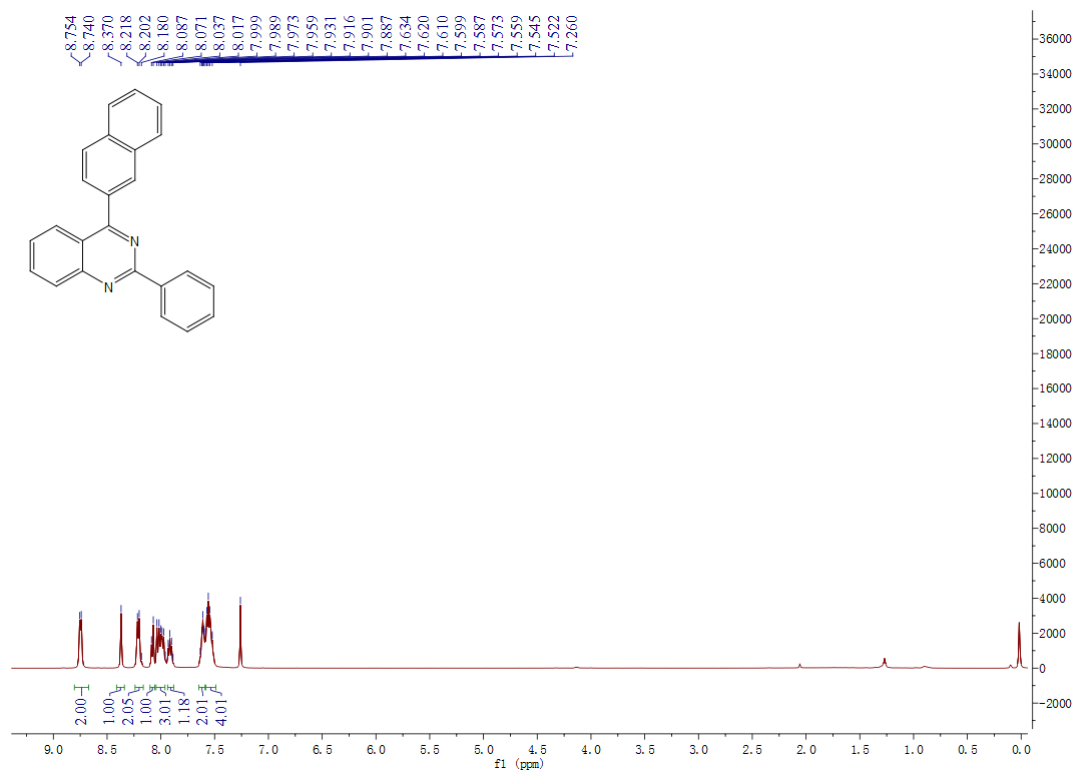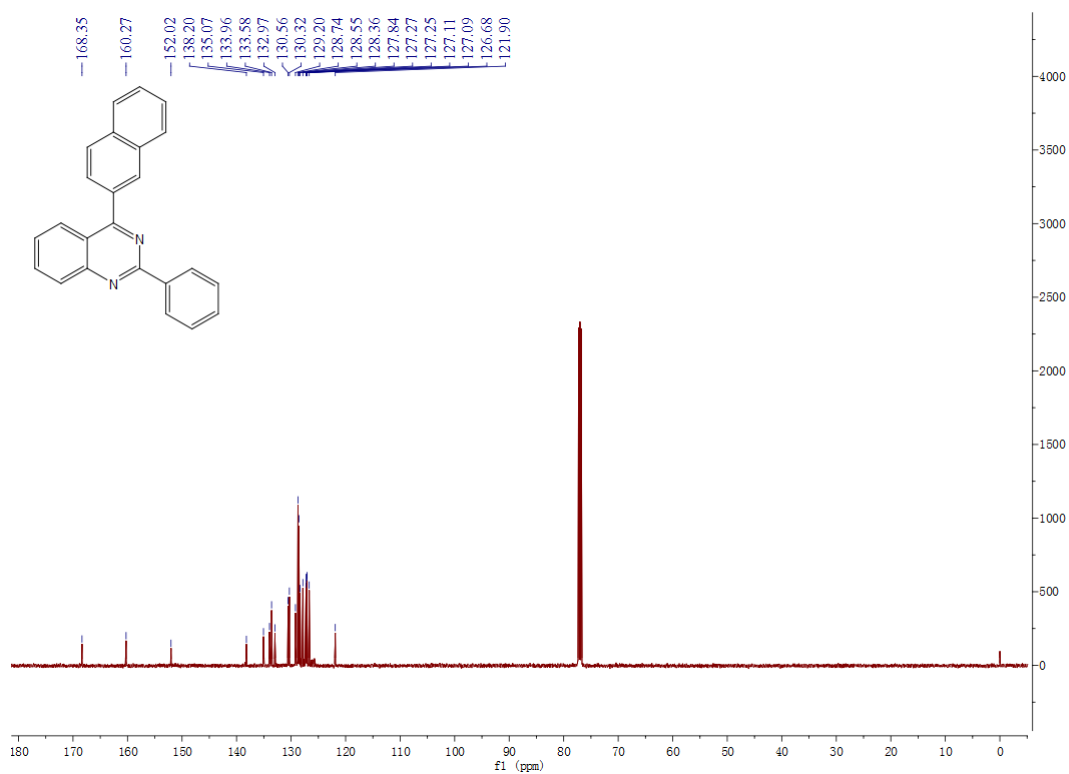

**Figure S13.**  $^1\text{H NMR}$  of **3n** (500 MHz,  $\text{CDCl}_3$ ) and  $^{13}\text{C NMR}$  of **3n** (125 MHz,  $\text{CDCl}_3$ ).

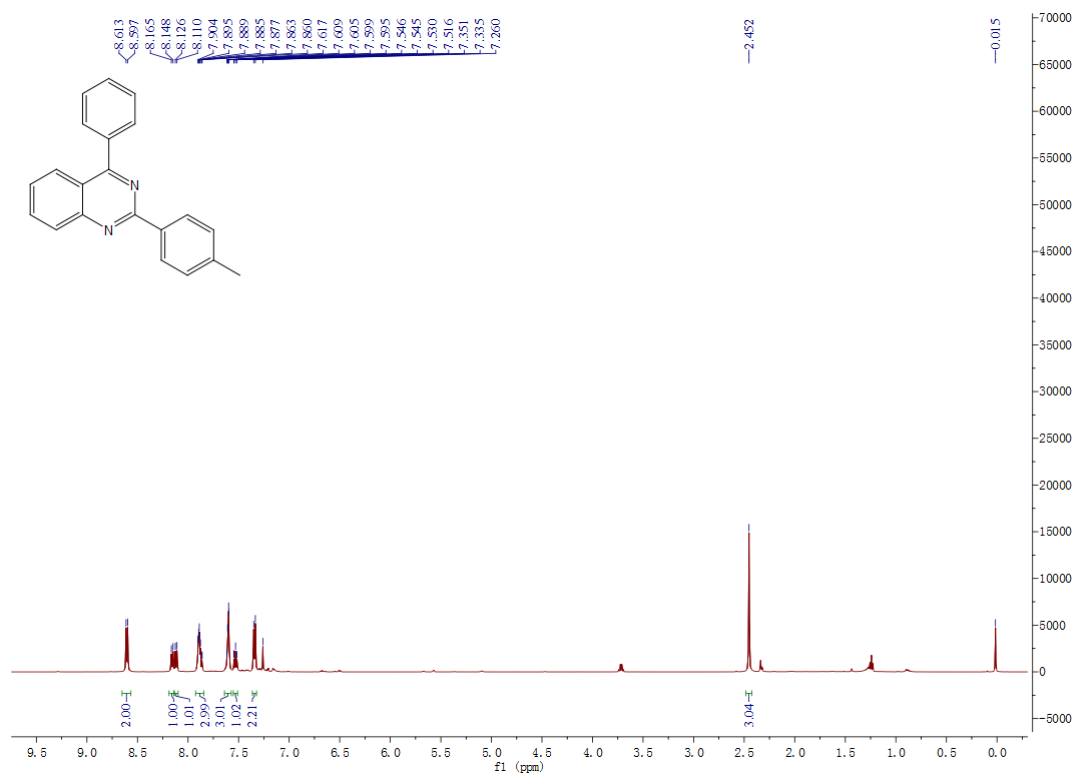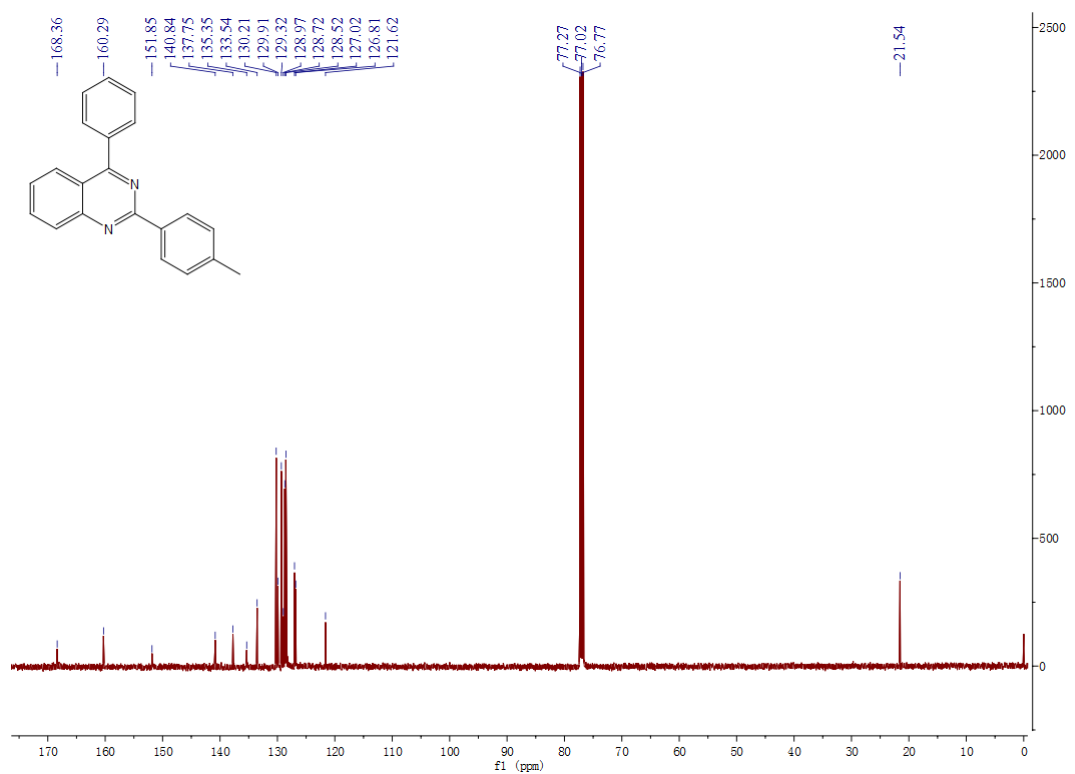

**Figure S14.** <sup>1</sup>H NMR of **3o** (500 MHz, CDCl<sub>3</sub>) and <sup>13</sup>C NMR of **3o** (125 MHz, CDCl<sub>3</sub>).

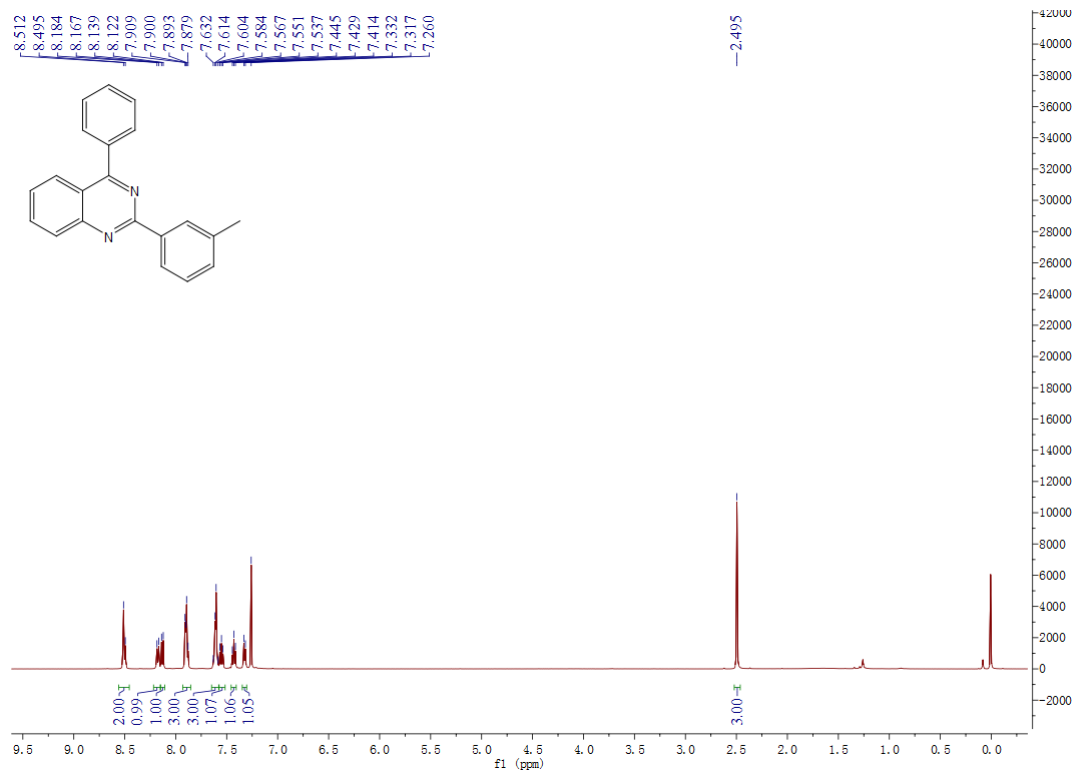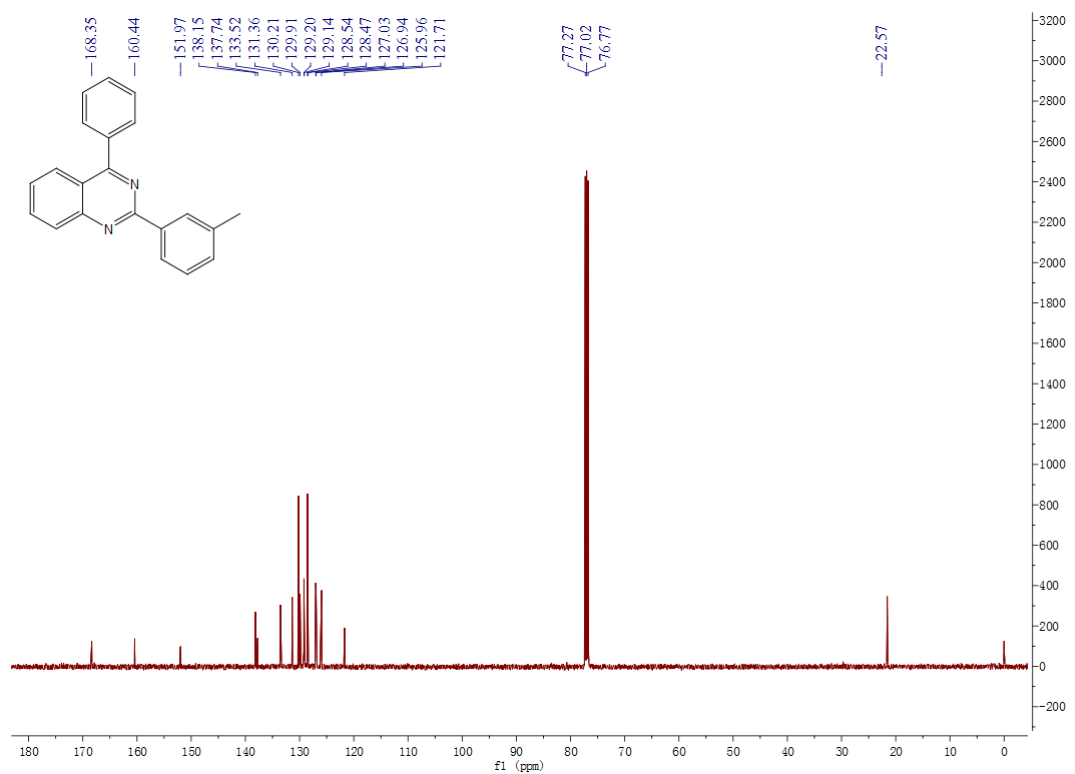

Figure S15. <sup>1</sup>H NMR of **3p** (500 MHz, CDCl<sub>3</sub>) and <sup>13</sup>C NMR of **3p** (125 MHz, CDCl<sub>3</sub>).

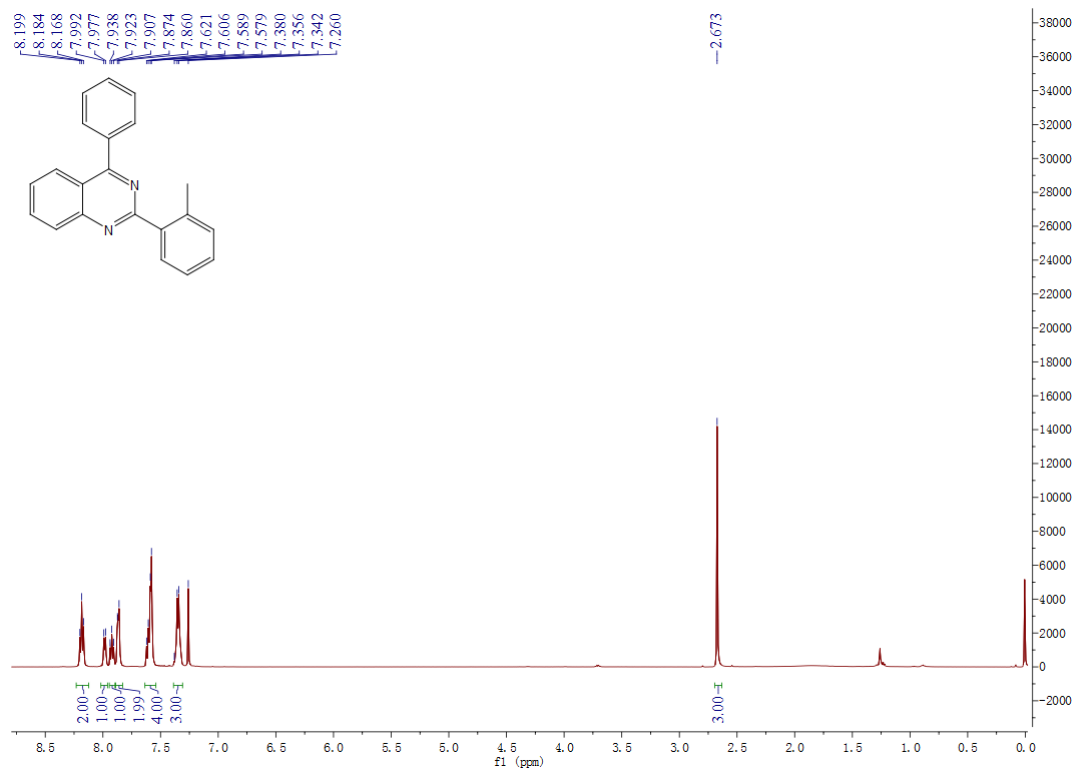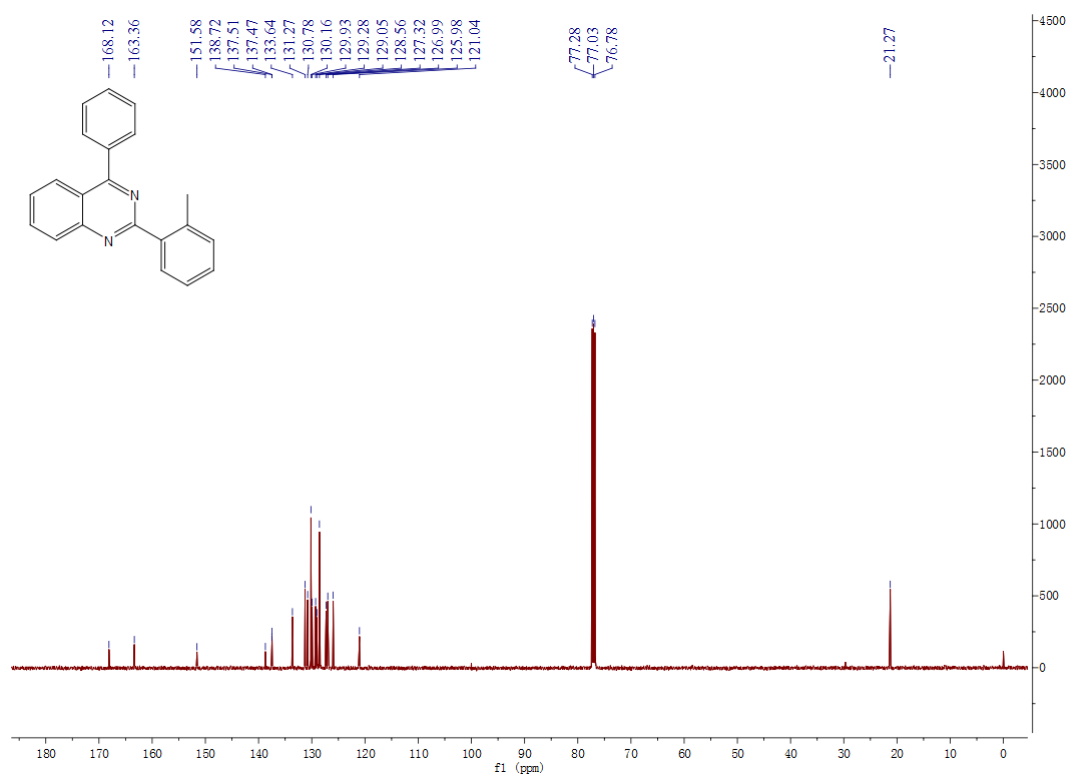

**Figure S16.** <sup>1</sup>H NMR of **3q** (500 MHz, CDCl<sub>3</sub>) and <sup>13</sup>C NMR of **3q** (125 MHz, CDCl<sub>3</sub>).



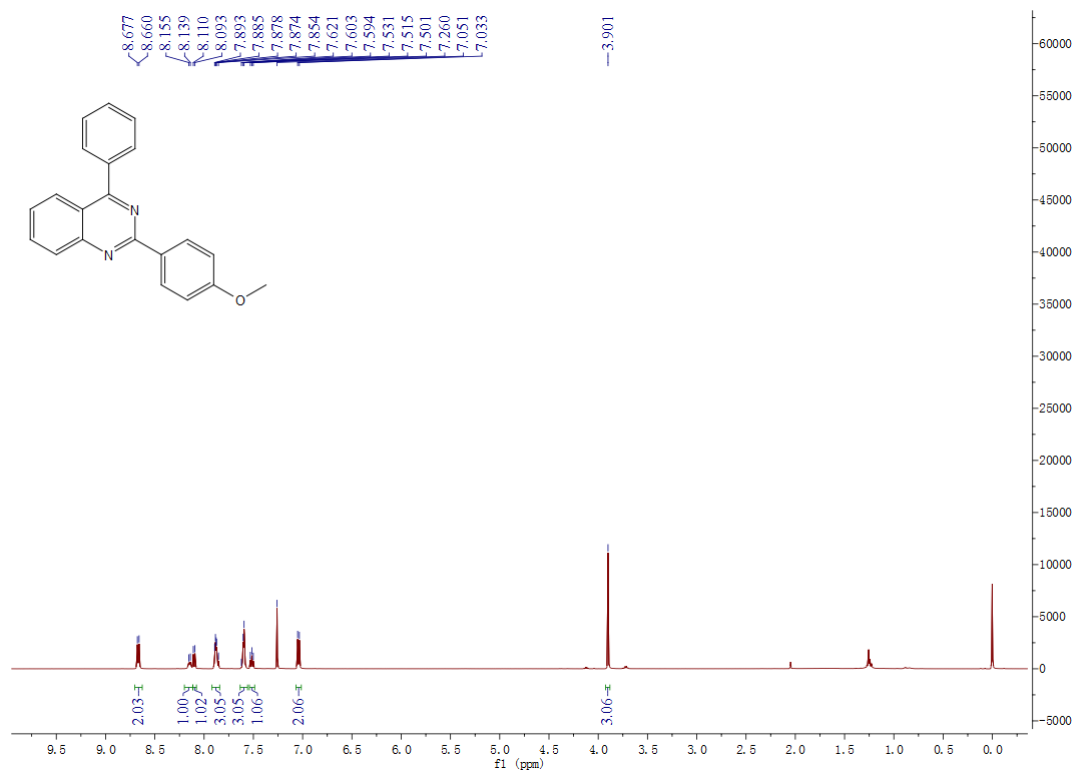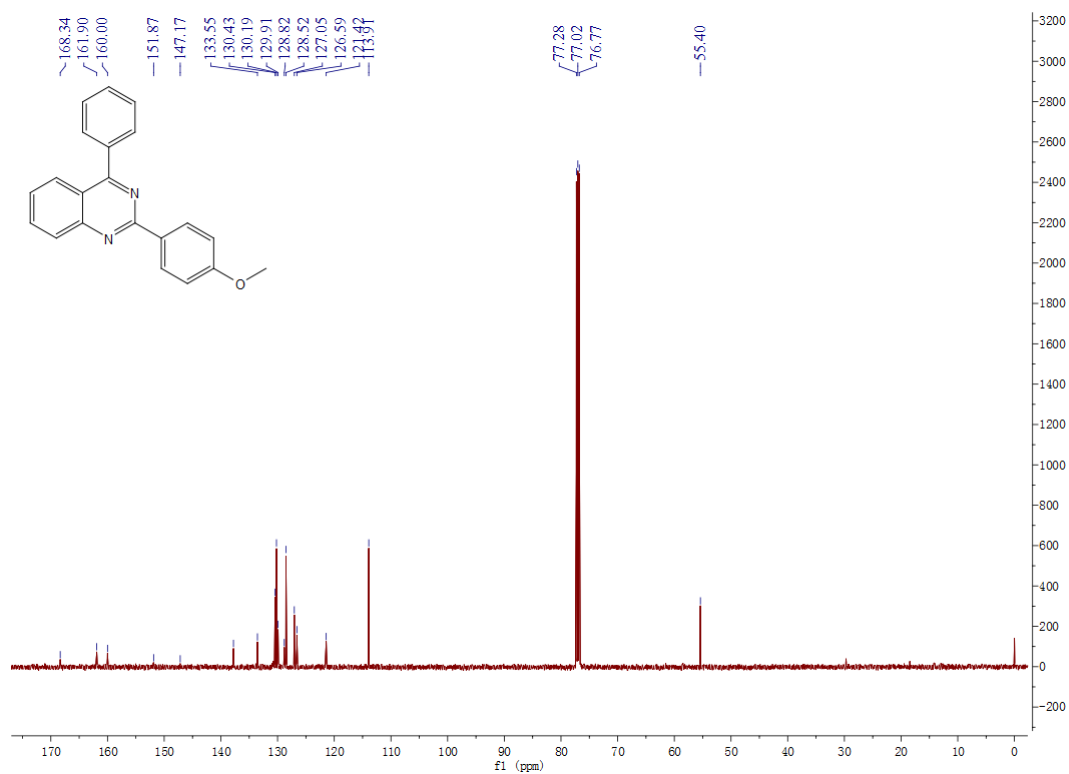

Figure S17. <sup>1</sup>H NMR of **3r** (500 MHz, CDCl<sub>3</sub>) and <sup>13</sup>C NMR of **3r** (125 MHz, CDCl<sub>3</sub>).

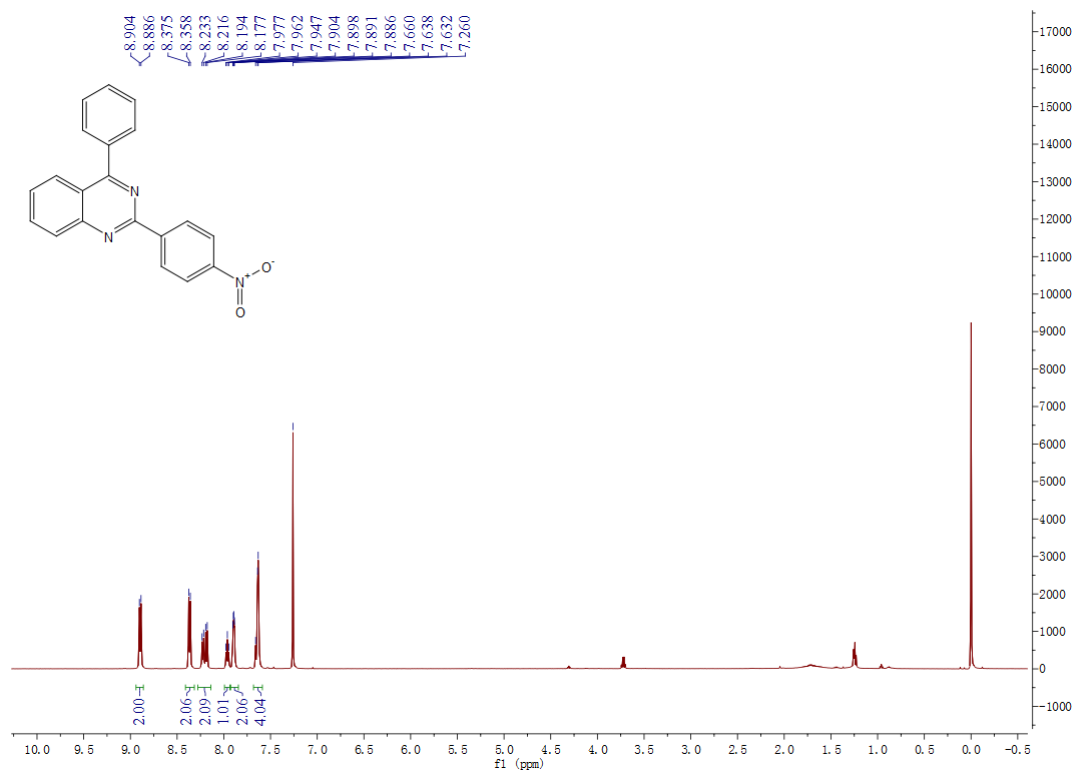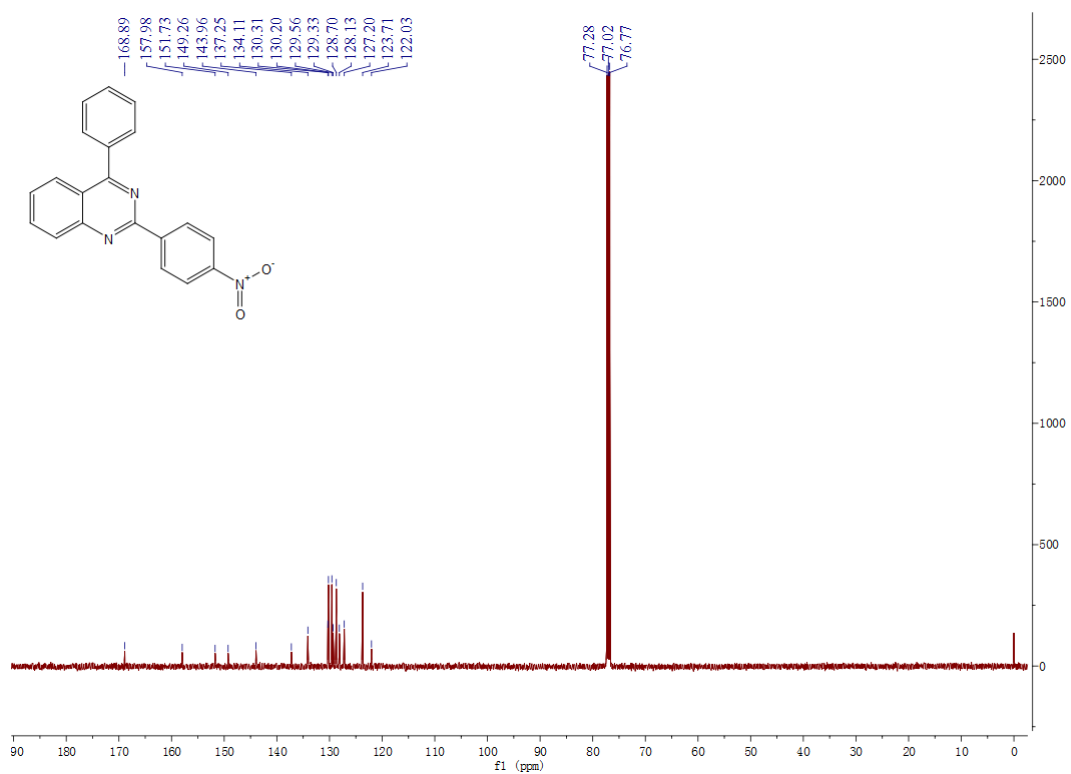

**Figure S18.** <sup>1</sup>H NMR of **3s** (500 MHz, CDCl<sub>3</sub>) and <sup>13</sup>C NMR of **3s** (125 MHz, CDCl<sub>3</sub>).

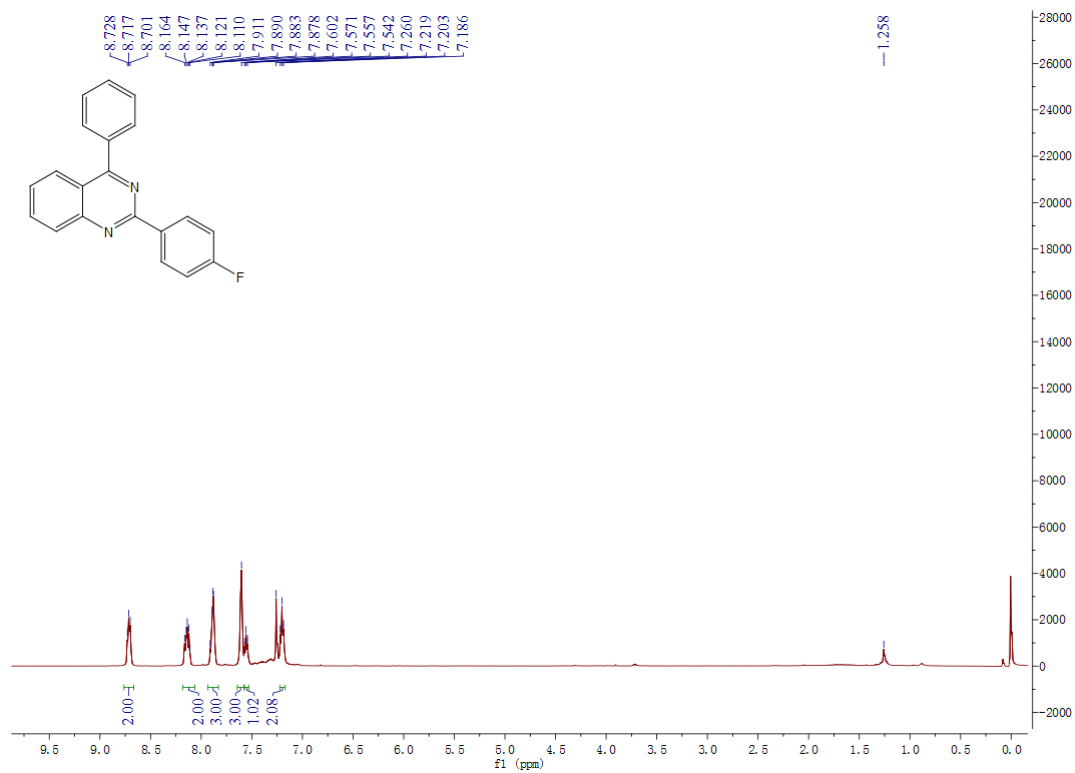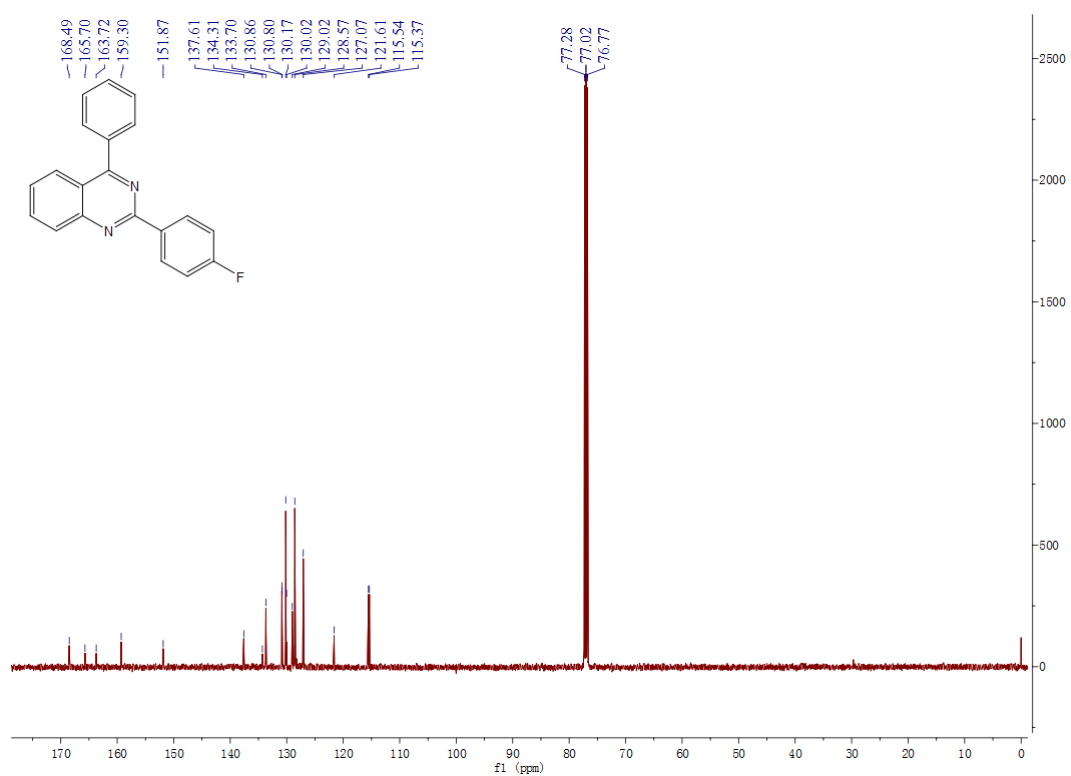

**Figure S19.** <sup>1</sup>H NMR of **3t** (500 MHz, CDCl<sub>3</sub>) and <sup>13</sup>C NMR of **3t** (125 MHz, CDCl<sub>3</sub>).

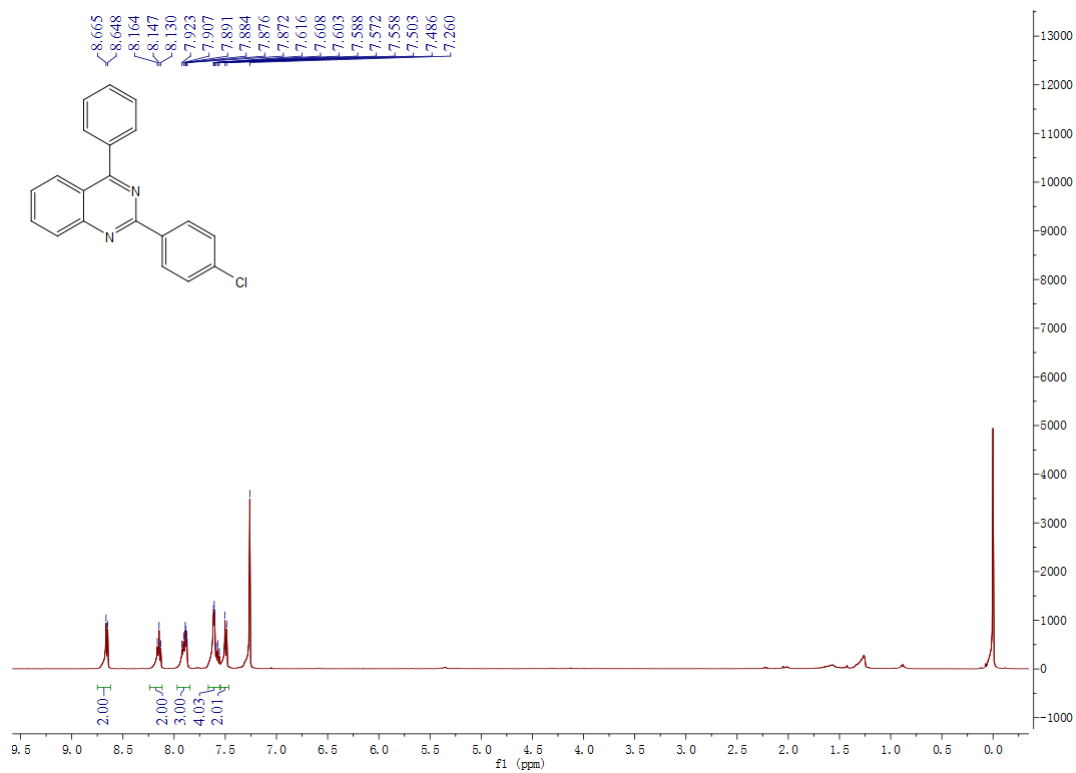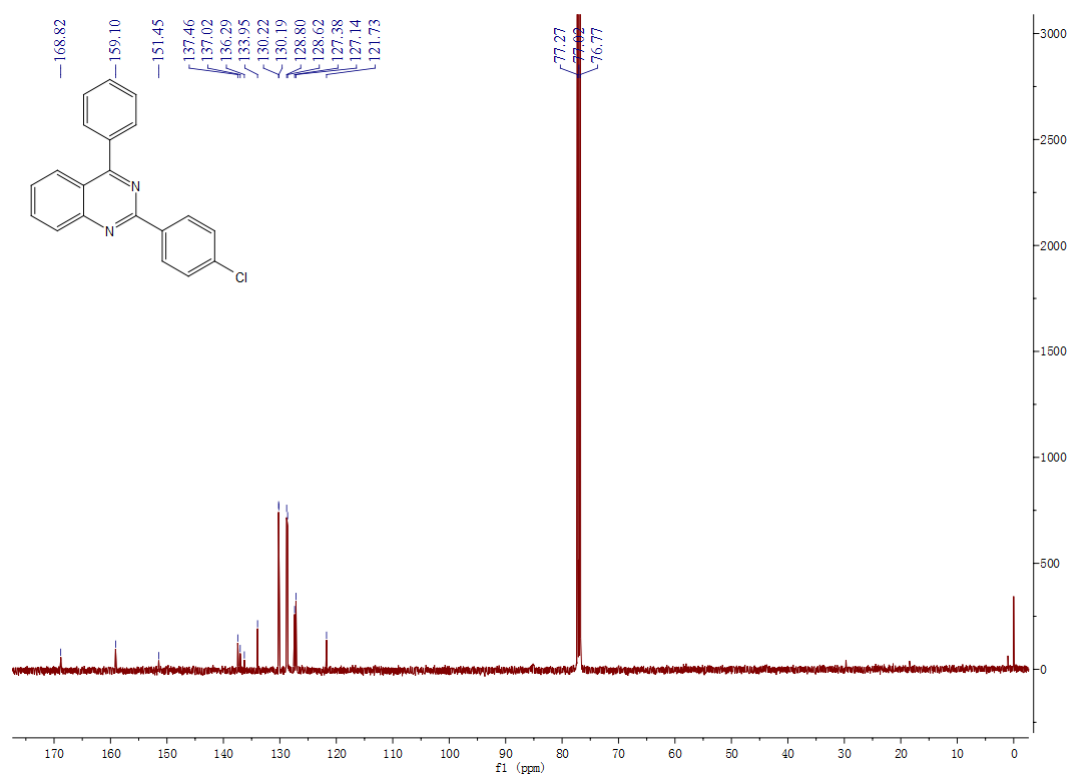

**Figure S20.** <sup>1</sup>H NMR of **3u** (500 MHz, CDCl<sub>3</sub>) and <sup>13</sup>C NMR of **3u** (125 MHz, CDCl<sub>3</sub>).

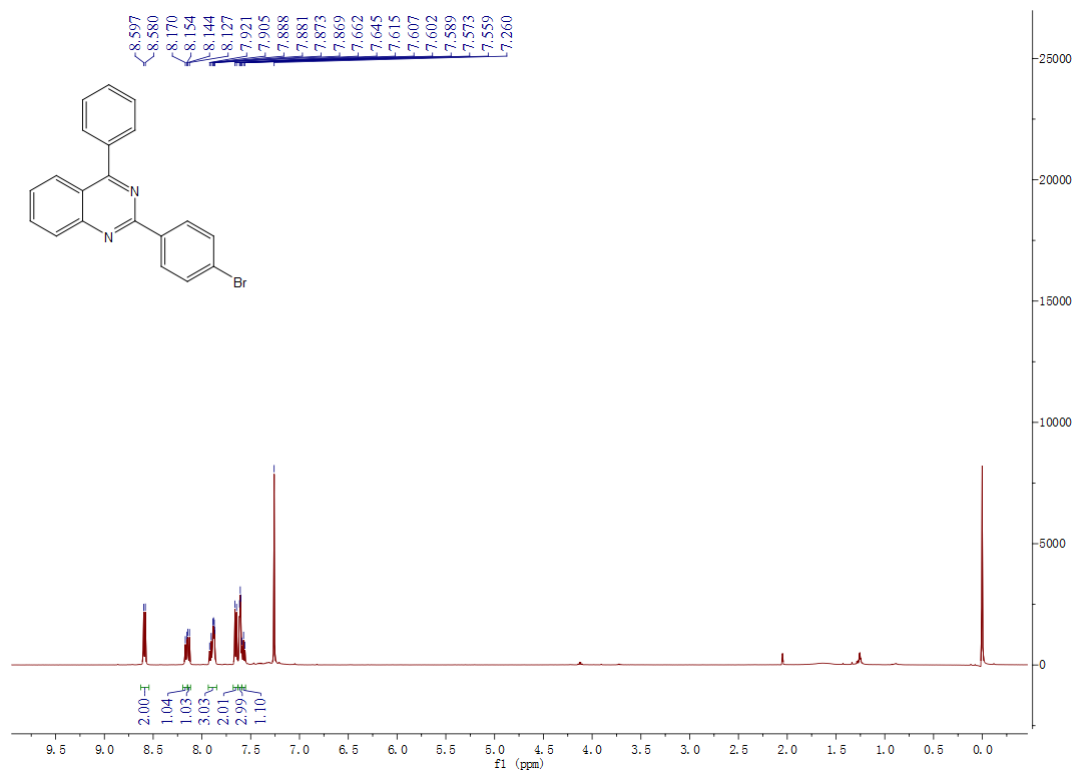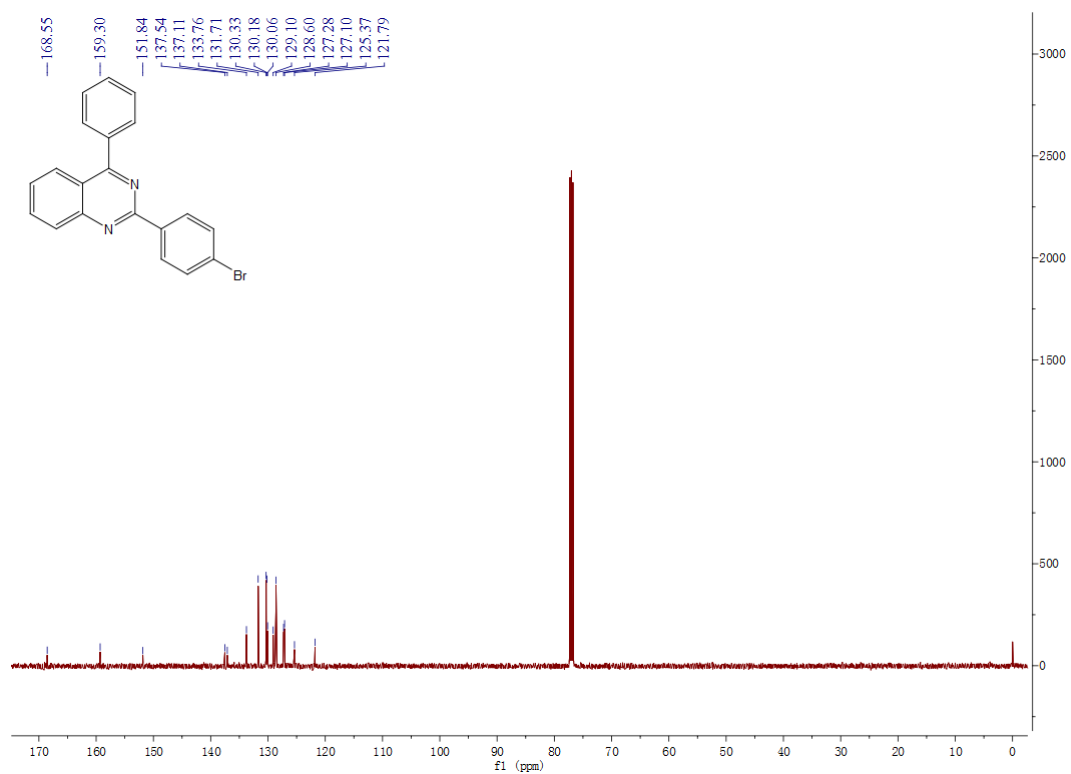

**Figure S21.** <sup>1</sup>H NMR of **3v** (500 MHz, CDCl<sub>3</sub>) and <sup>13</sup>C NMR of **3v** (125 MHz, CDCl<sub>3</sub>).

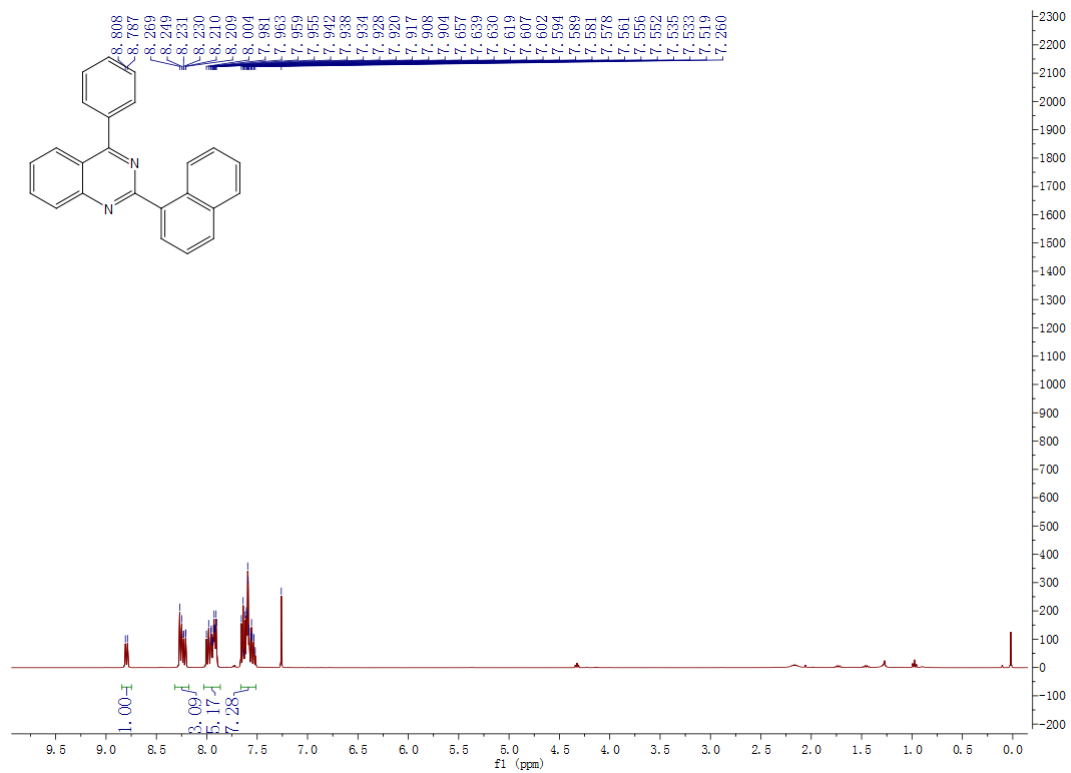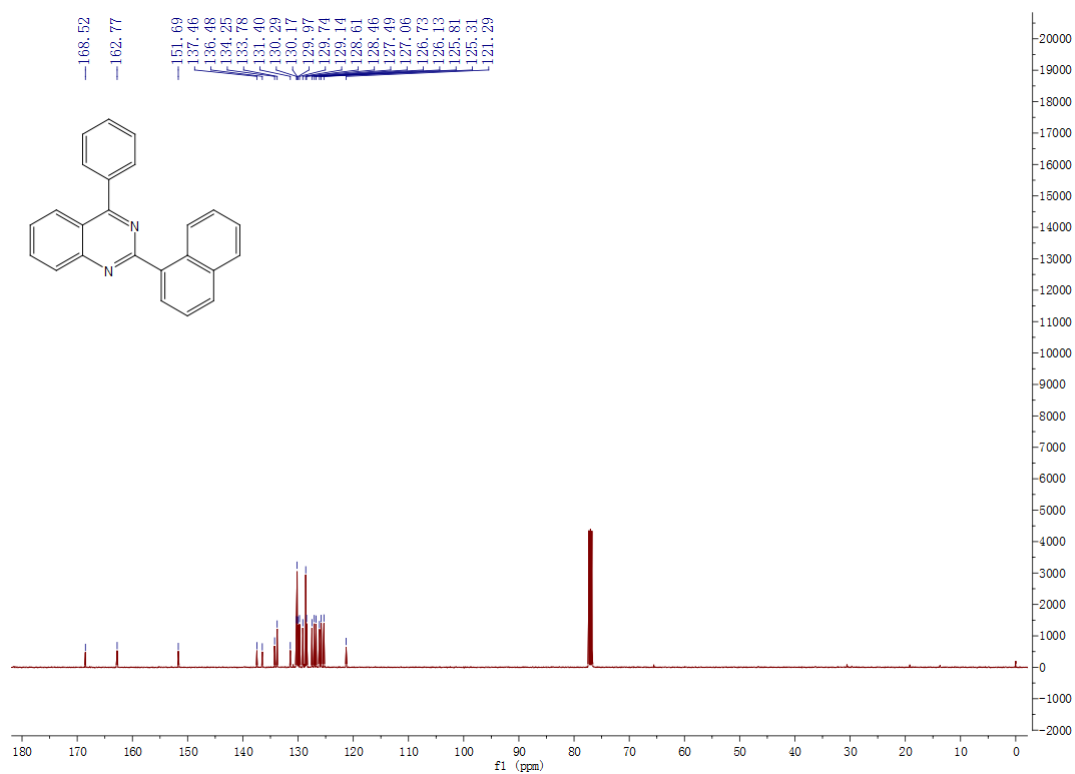

**Figure S22.** <sup>1</sup>H NMR of **3w** (500 MHz, CDCl<sub>3</sub>) and <sup>13</sup>C NMR of **3w** (125 MHz, CDCl<sub>3</sub>).

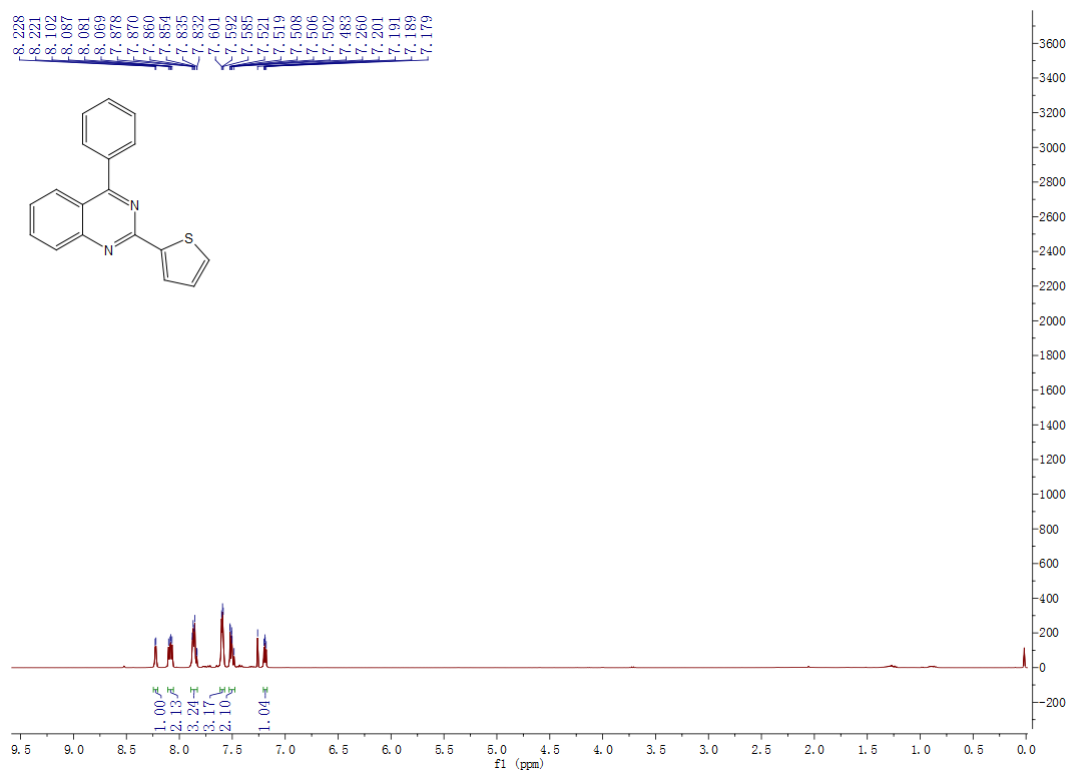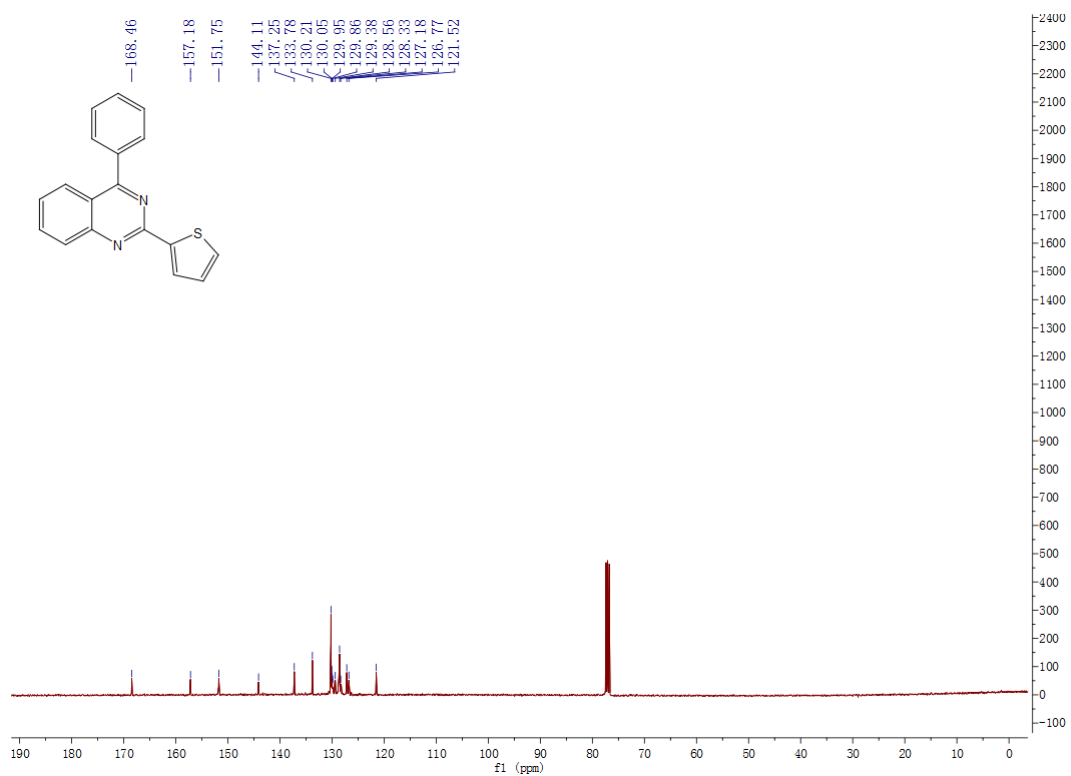

**Figure S23.** <sup>1</sup>H NMR of **3x** (500 MHz, CDCl<sub>3</sub>) and <sup>13</sup>C NMR of **3x** (125 MHz, CDCl<sub>3</sub>).

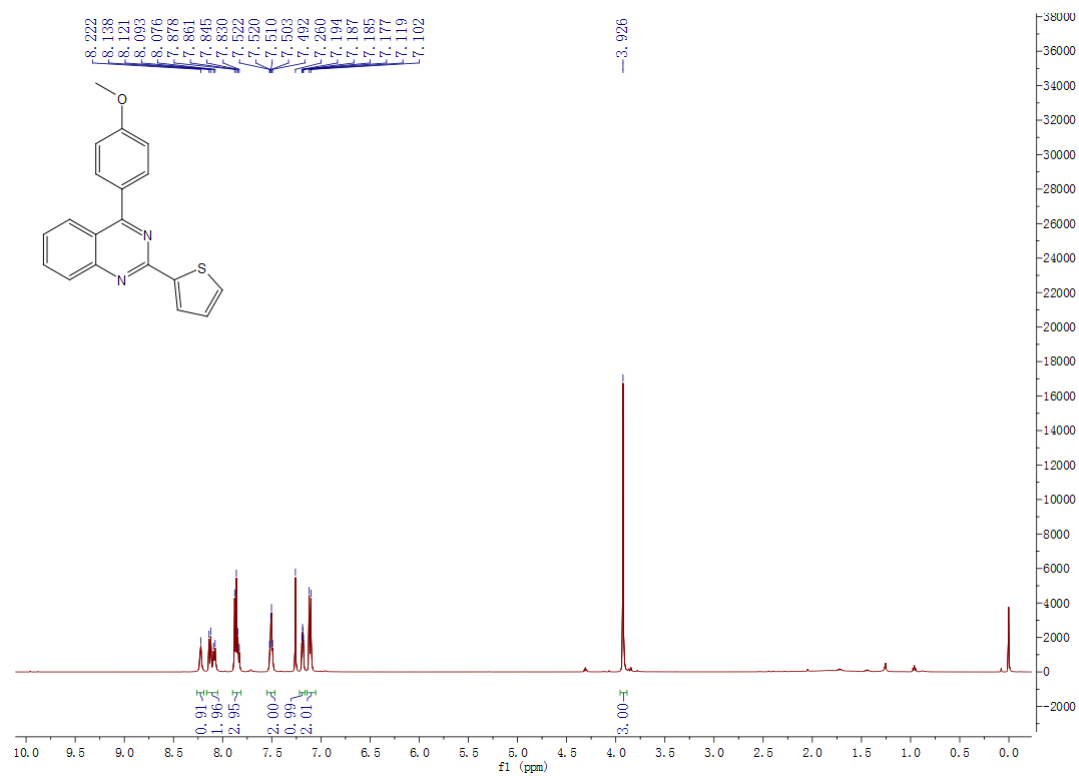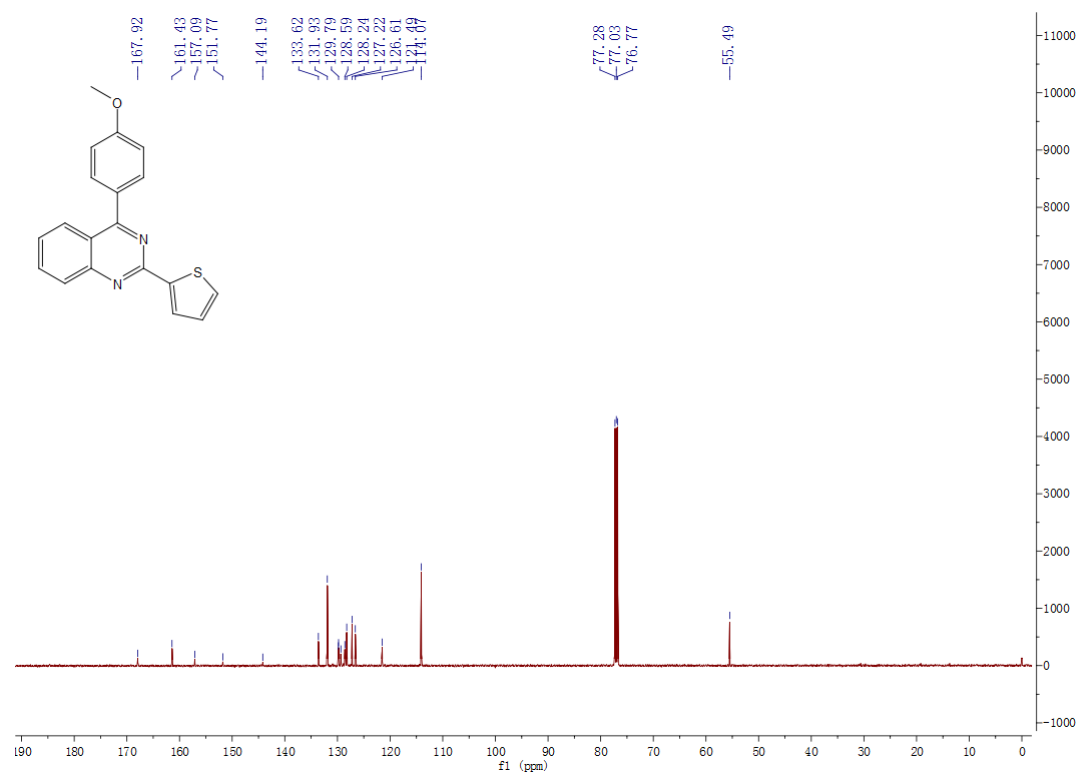

**Figure S24.** <sup>1</sup>H NMR of **3y** (500 MHz, CDCl<sub>3</sub>) and <sup>13</sup>C NMR of **3y** (125 MHz, CDCl<sub>3</sub>).



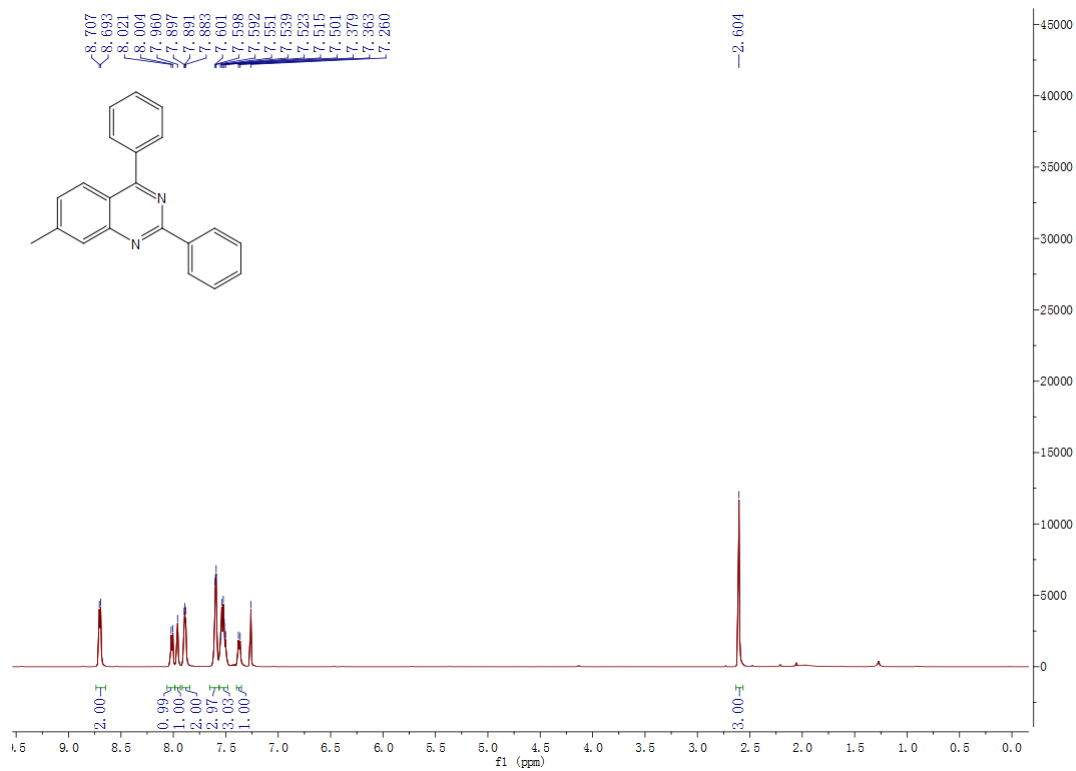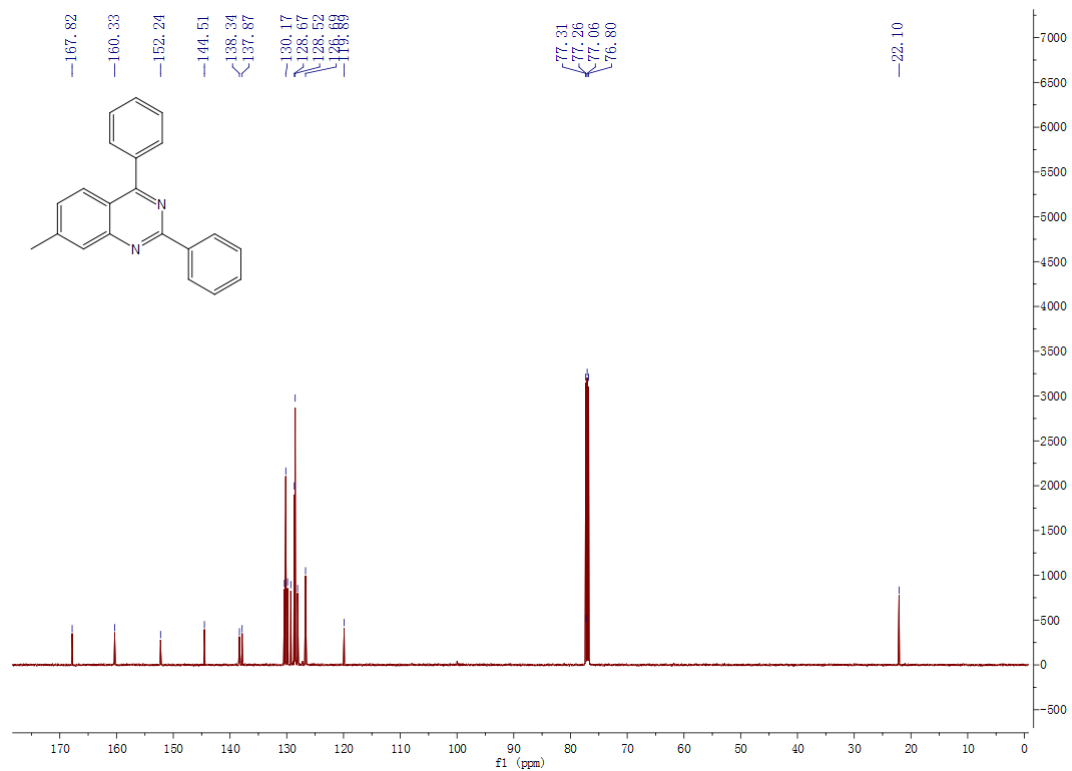

**Figure S25.** <sup>1</sup>H NMR of **3z** (500 MHz, CDCl<sub>3</sub>) and <sup>13</sup>C NMR of **3z** (125 MHz, CDCl<sub>3</sub>).

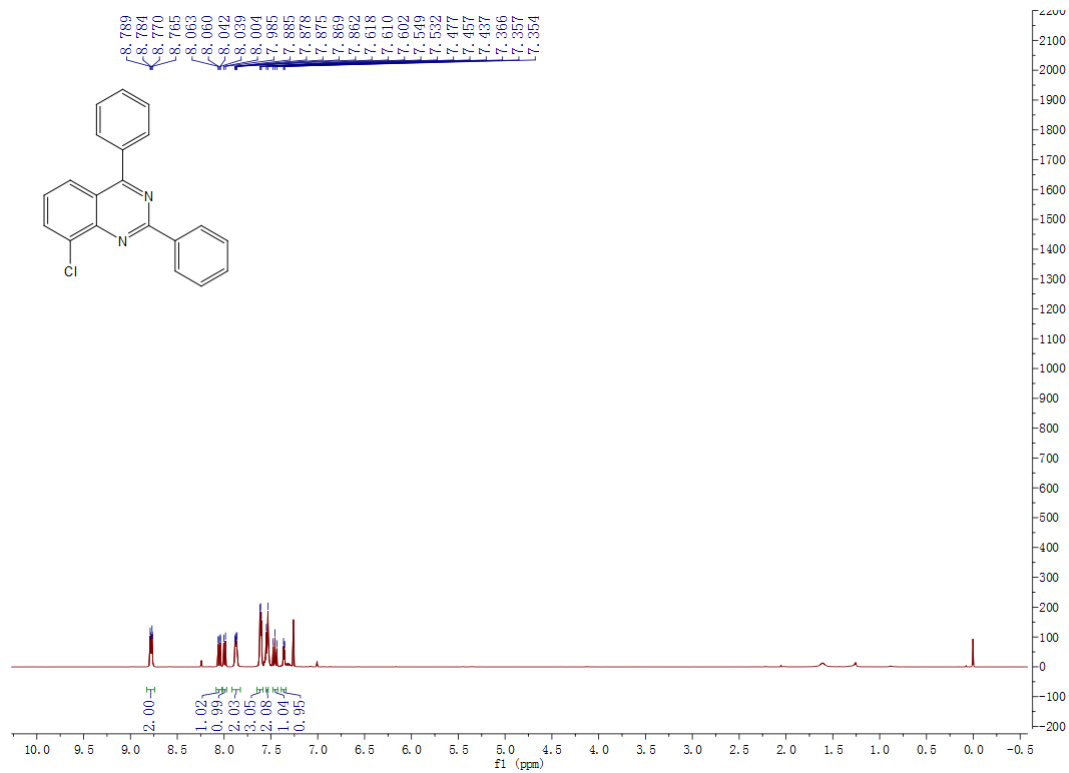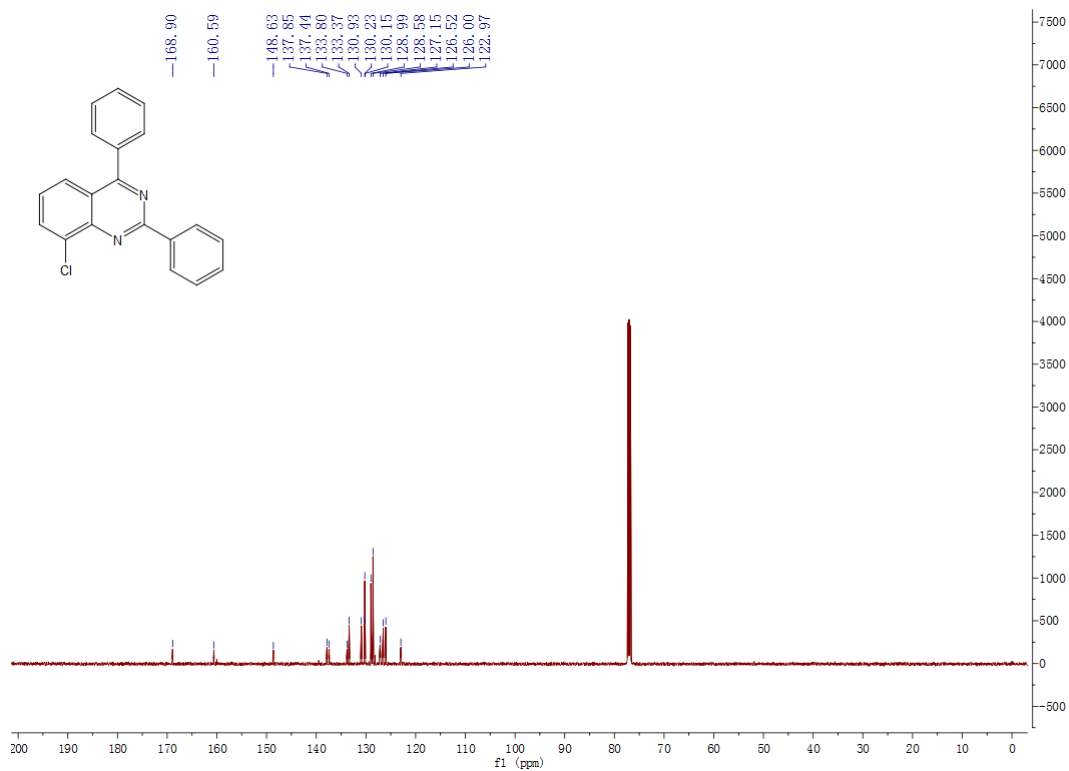

Figure S26. <sup>1</sup>H NMR of **4a** (500 MHz, CDCl<sub>3</sub>) and <sup>13</sup>C NMR of **4a** (125 MHz, CDCl<sub>3</sub>).

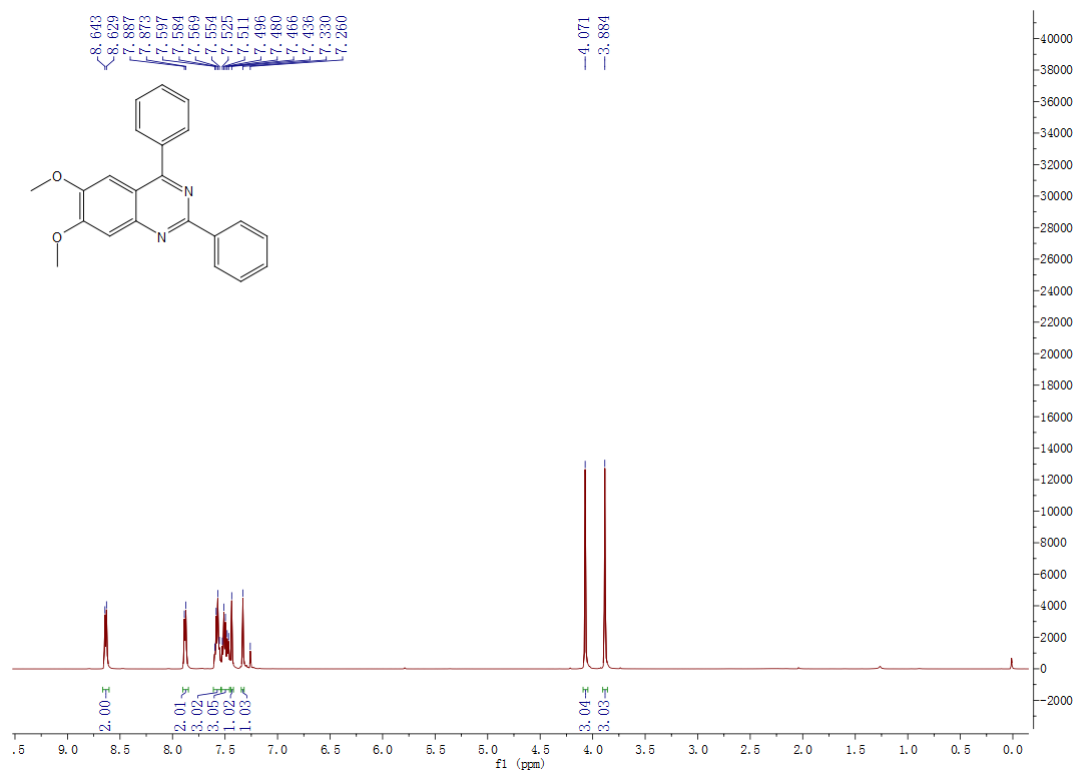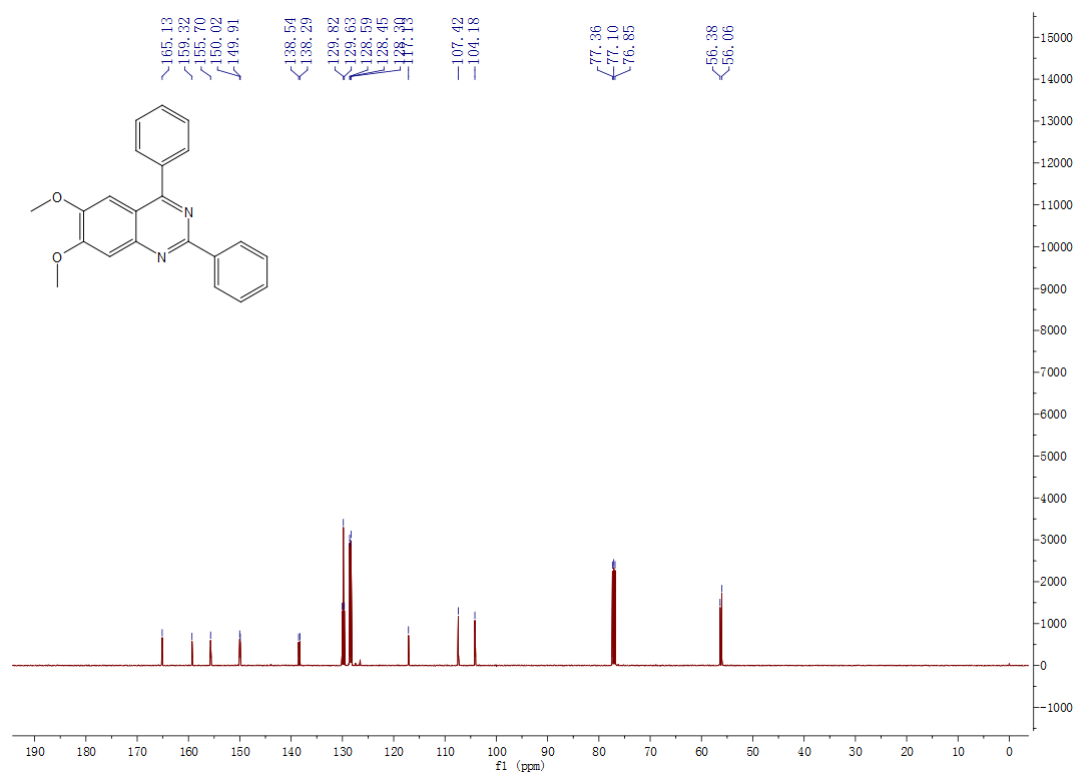

**Figure S27.** <sup>1</sup>H NMR of **4b** (500 MHz, CDCl<sub>3</sub>) and <sup>13</sup>C NMR of **4b** (125 MHz, CDCl<sub>3</sub>).

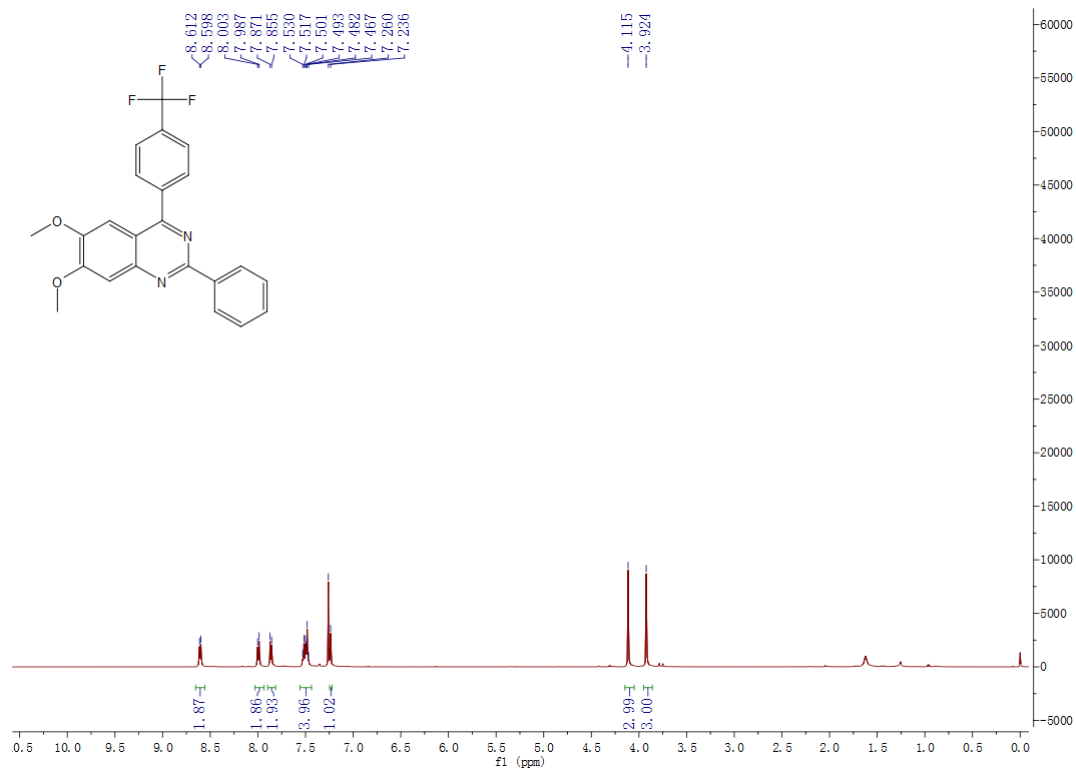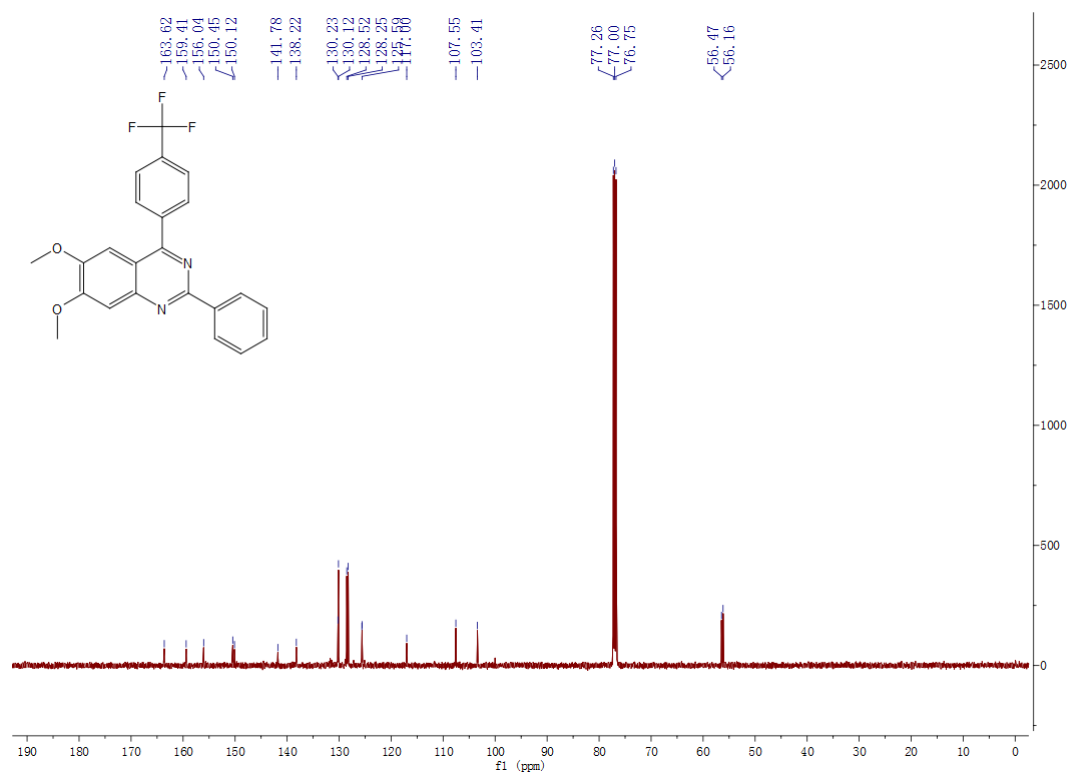

**Figure S28.** <sup>1</sup>H NMR of 4c (500 MHz, CDCl<sub>3</sub>) and <sup>13</sup>C NMR of 4c (125 MHz, CDCl<sub>3</sub>).

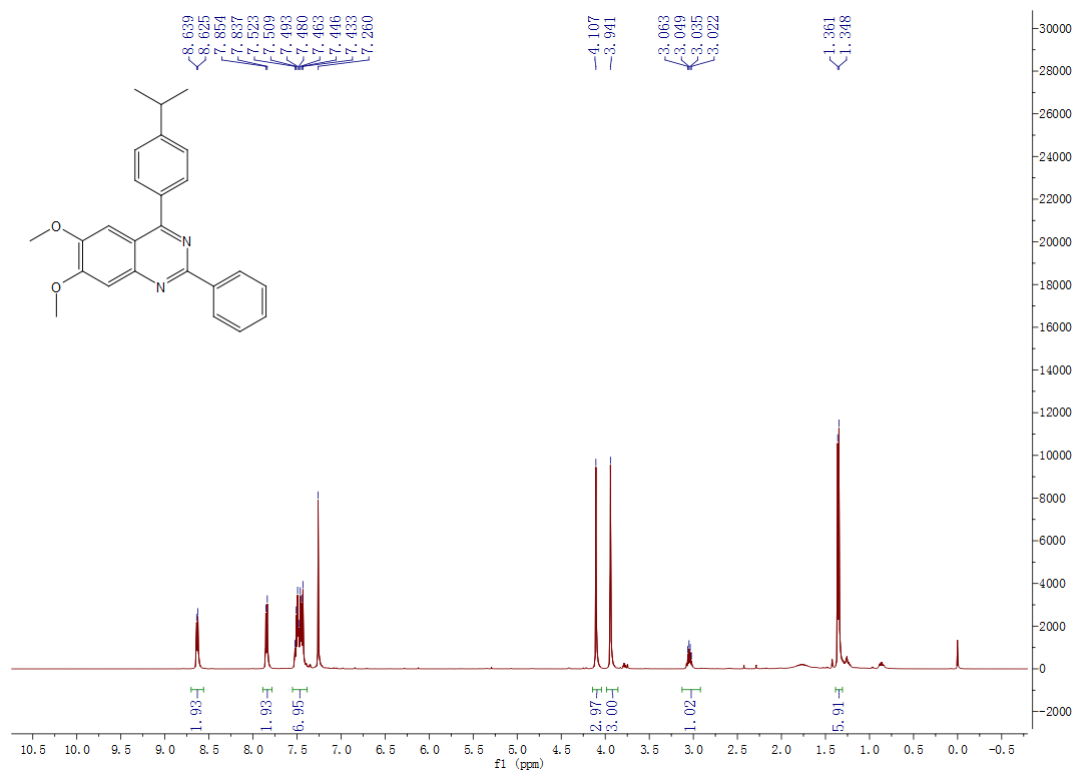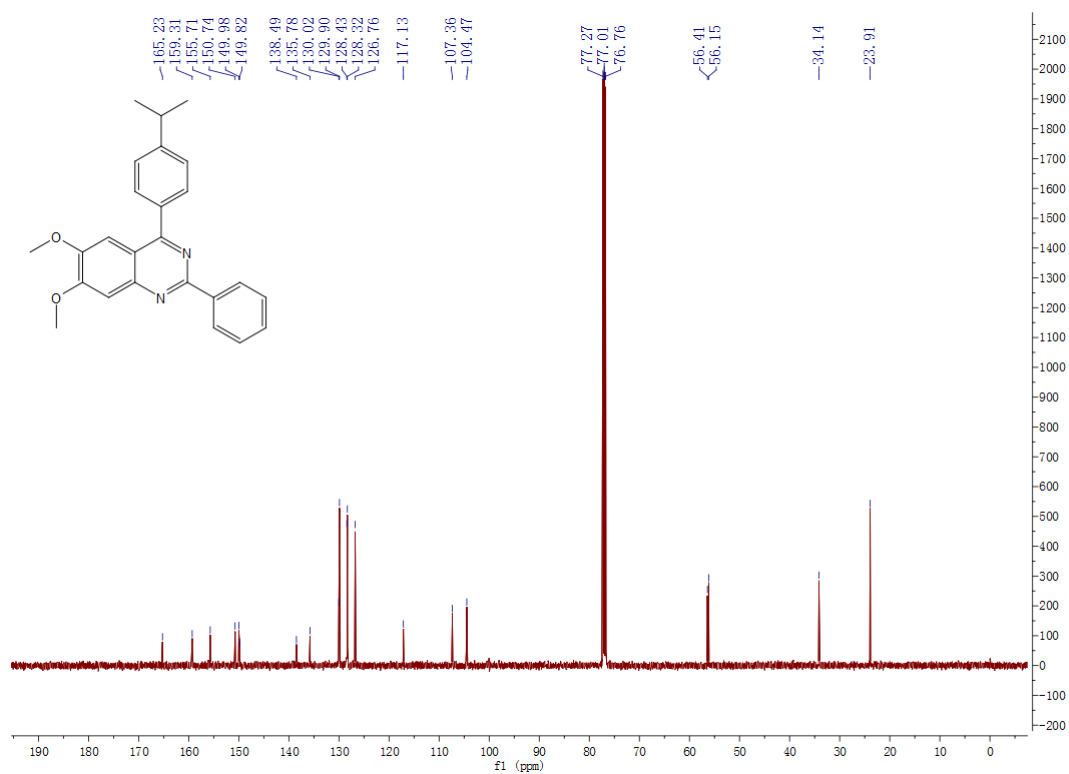

**Figure S29.** <sup>1</sup>H NMR of **4d** (500 MHz, CDCl<sub>3</sub>) and <sup>13</sup>C NMR of **4d** (125 MHz, CDCl<sub>3</sub>).

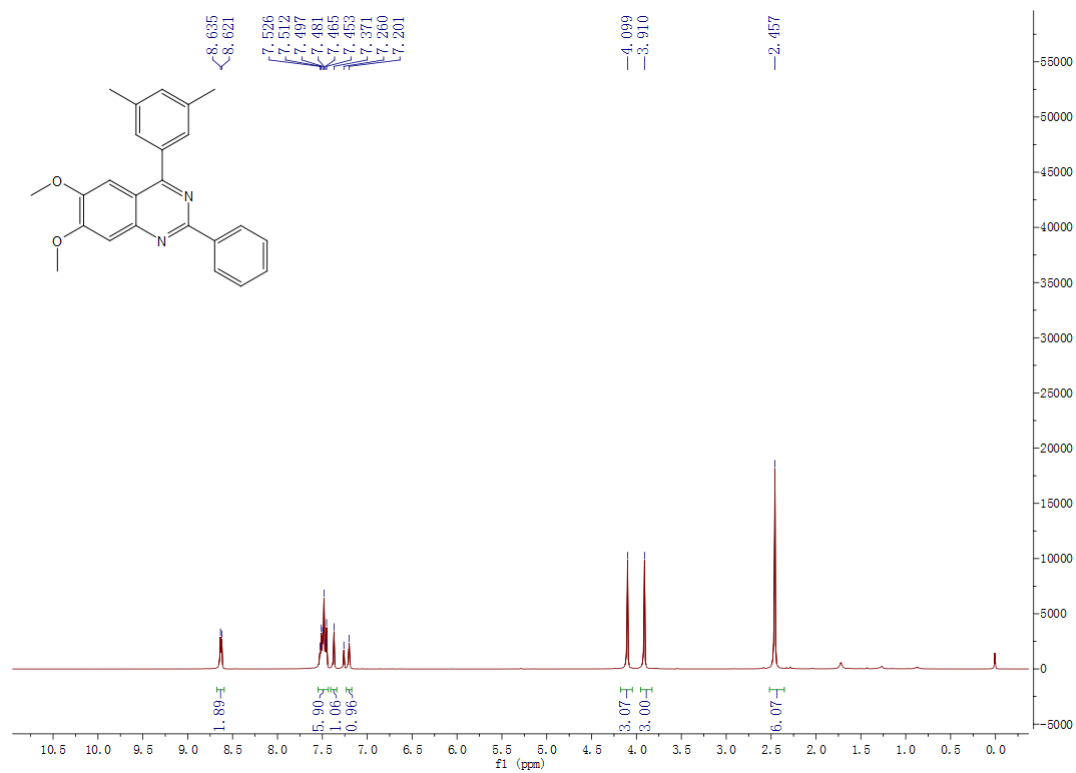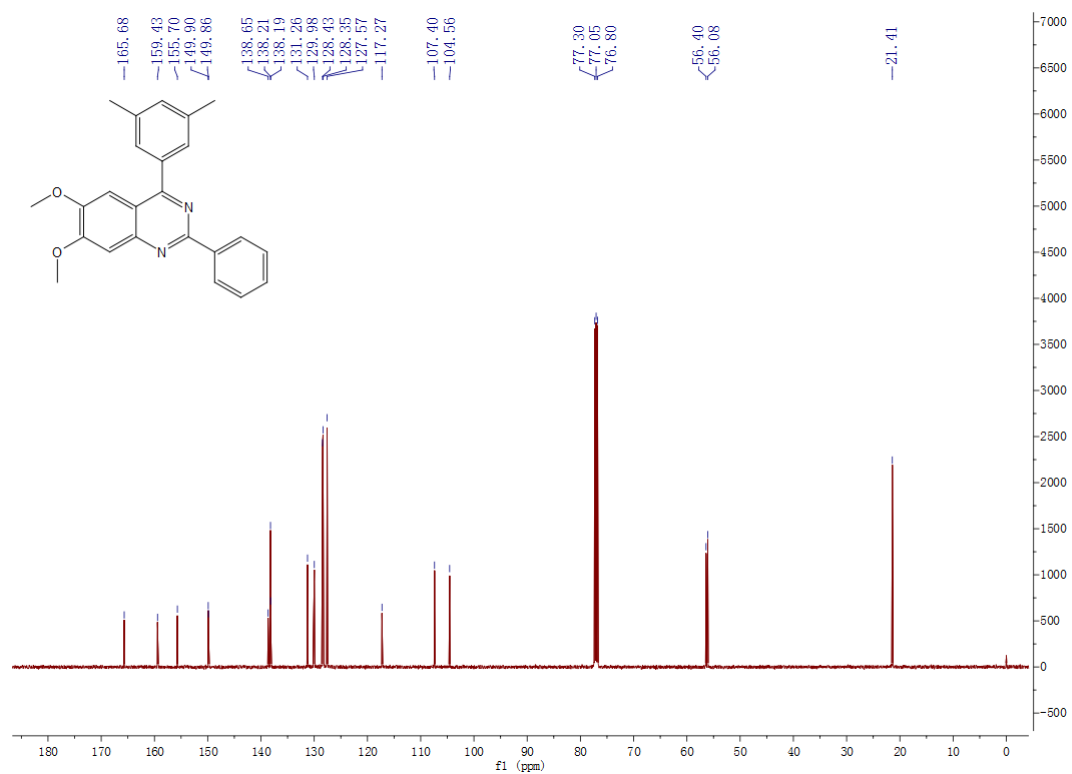

Figure S30. <sup>1</sup>H NMR of 4e (500 MHz, CDCl<sub>3</sub>) and <sup>13</sup>C NMR of 4e (125 MHz, CDCl<sub>3</sub>).

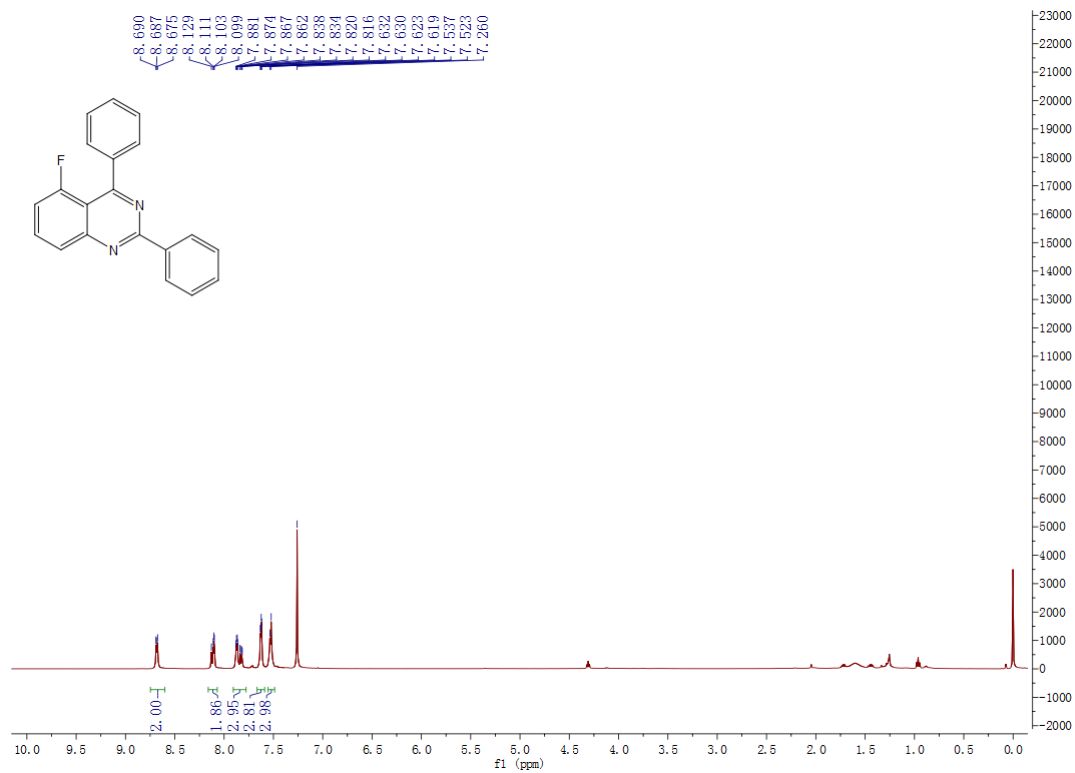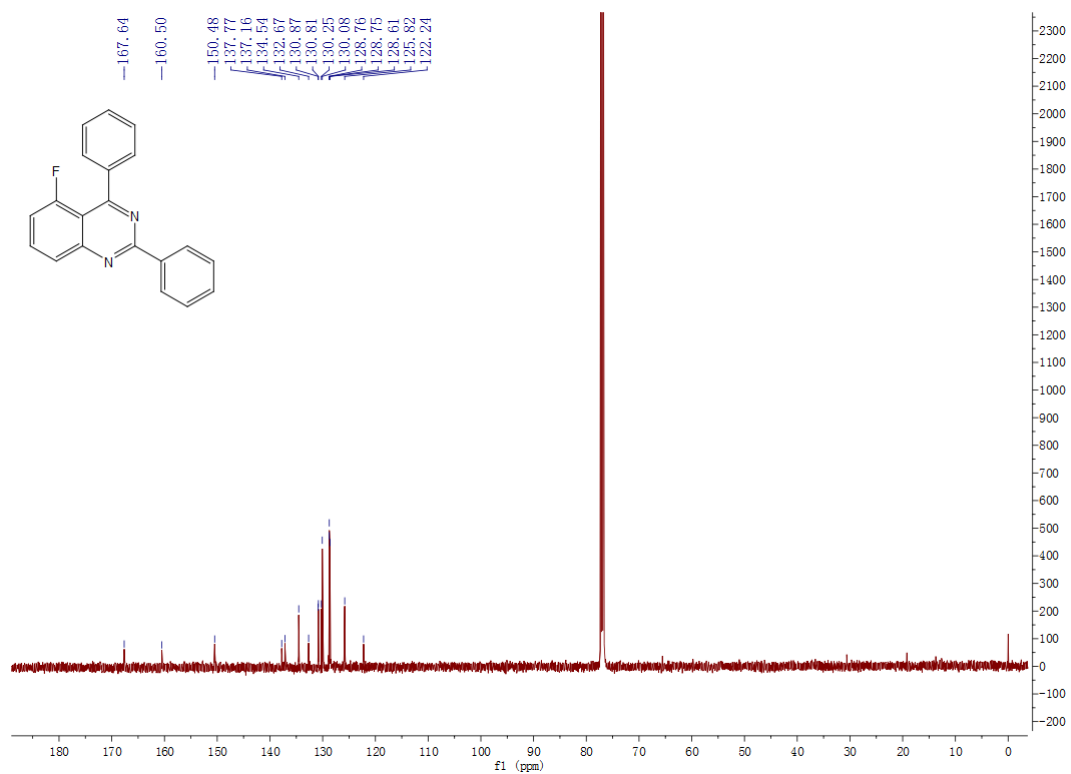

**Figure S31.** <sup>1</sup>H NMR of **4f** (500 MHz, CDCl<sub>3</sub>) and <sup>13</sup>C NMR of **4f** (125 MHz, CDCl<sub>3</sub>).

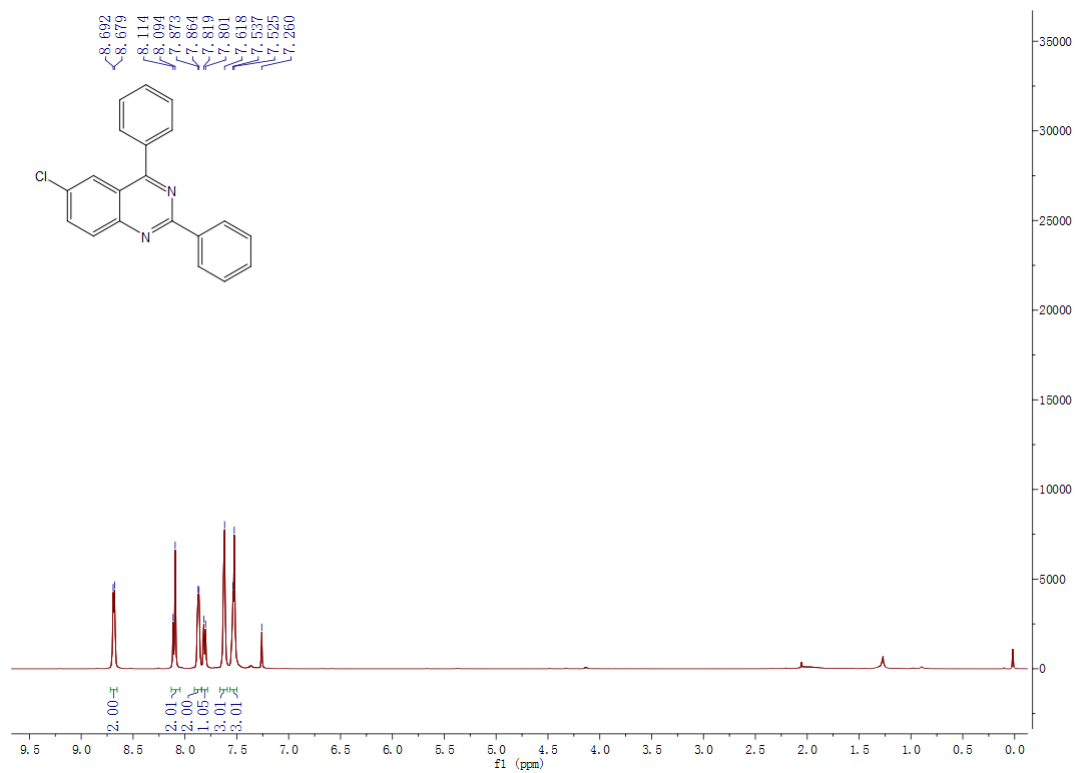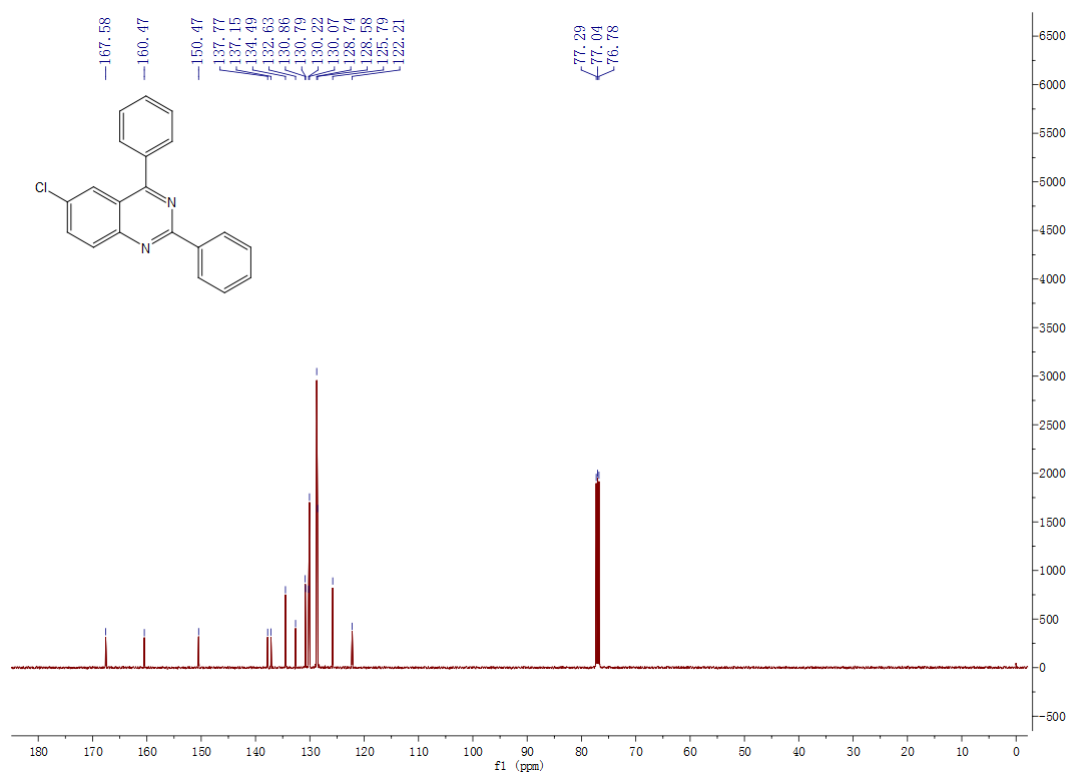

**Figure S32.** <sup>1</sup>H NMR of **4g** (500 MHz, CDCl<sub>3</sub>) and <sup>13</sup>C NMR of **4g** (125 MHz, CDCl<sub>3</sub>).



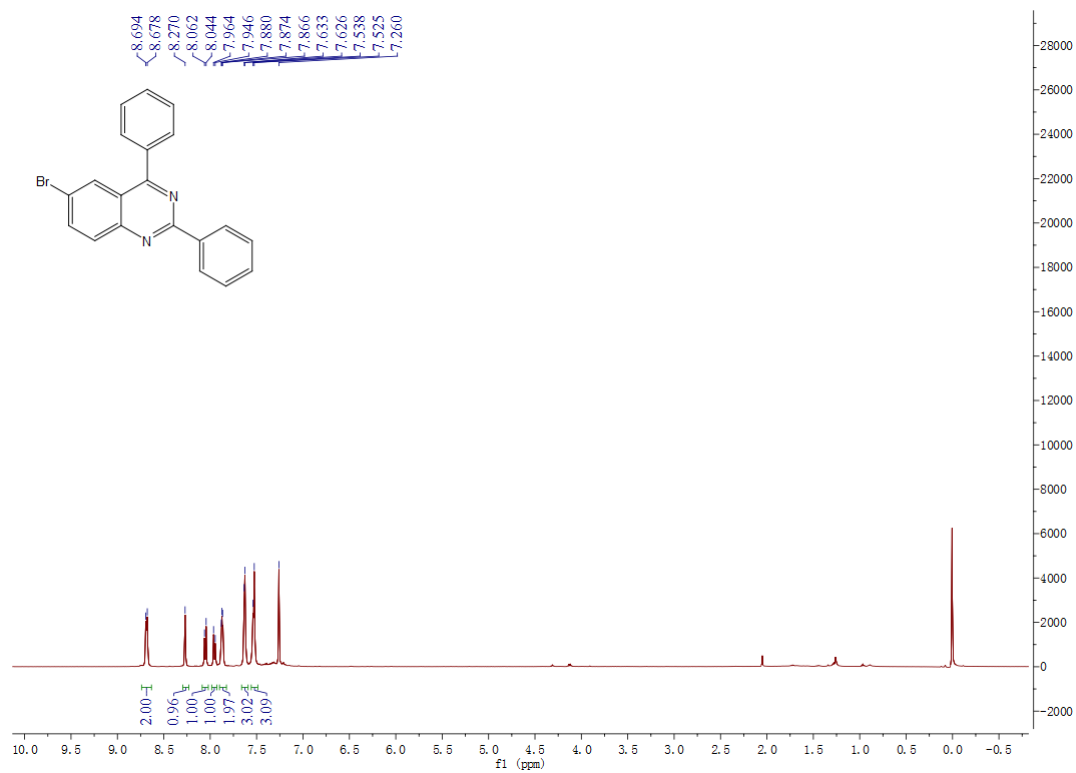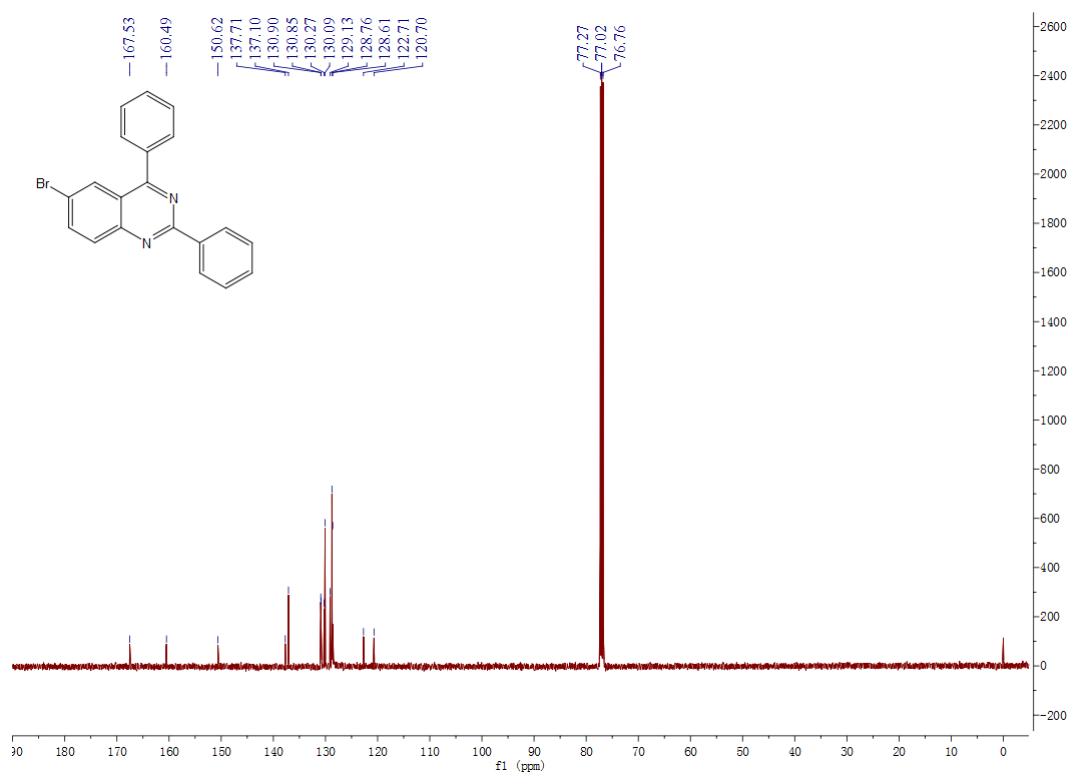

**Figure S33.** <sup>1</sup>H NMR of **4h** (500 MHz, CDCl<sub>3</sub>) and <sup>13</sup>C NMR of **4h** (125 MHz, CDCl<sub>3</sub>).

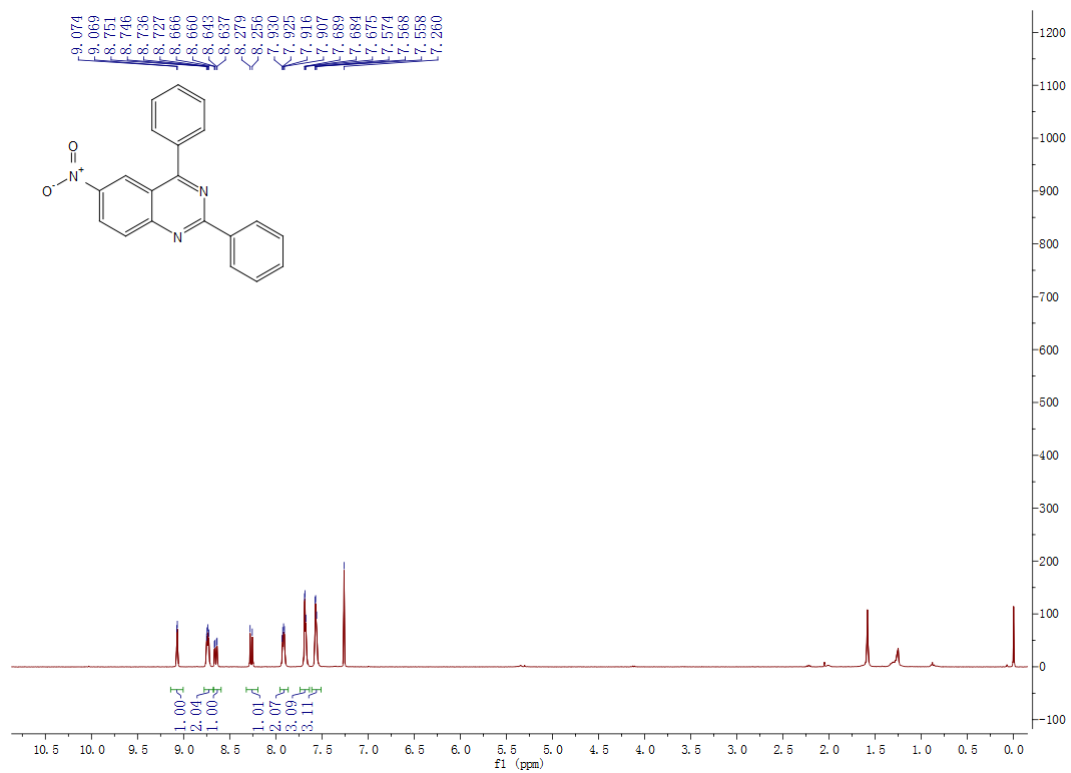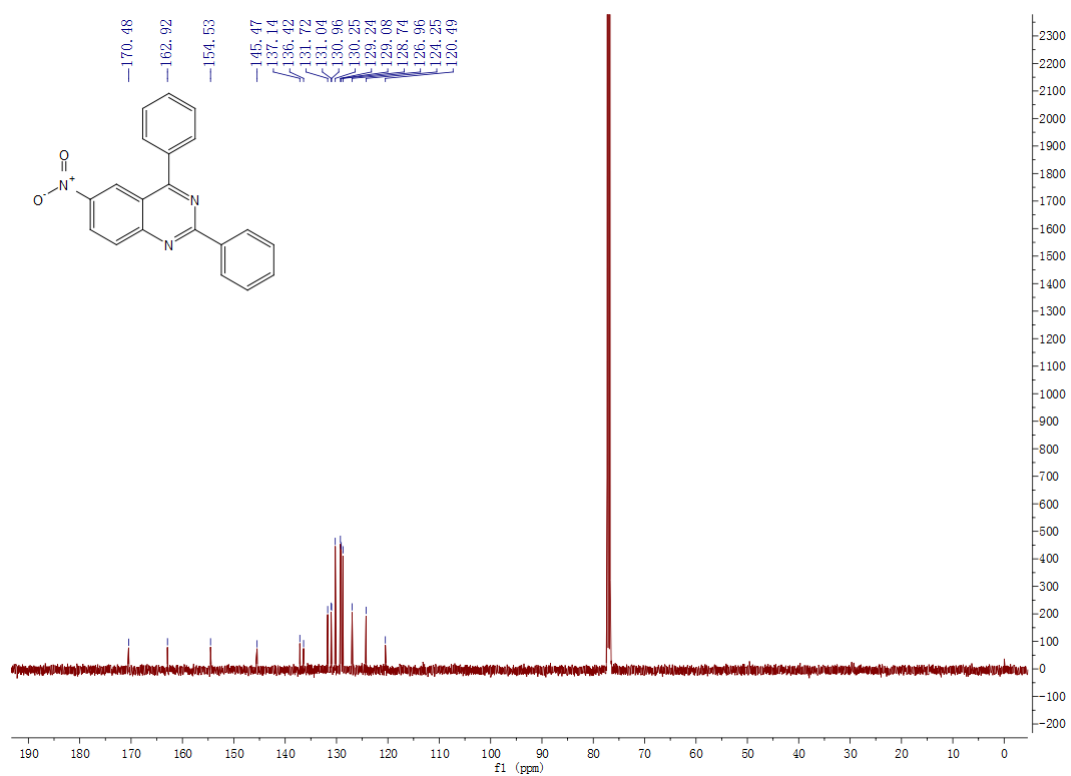

**Figure S34.** <sup>1</sup>H NMR of **4i** (500 MHz, CDCl<sub>3</sub>) and <sup>13</sup>C NMR of **4i** (125 MHz, CDCl<sub>3</sub>).

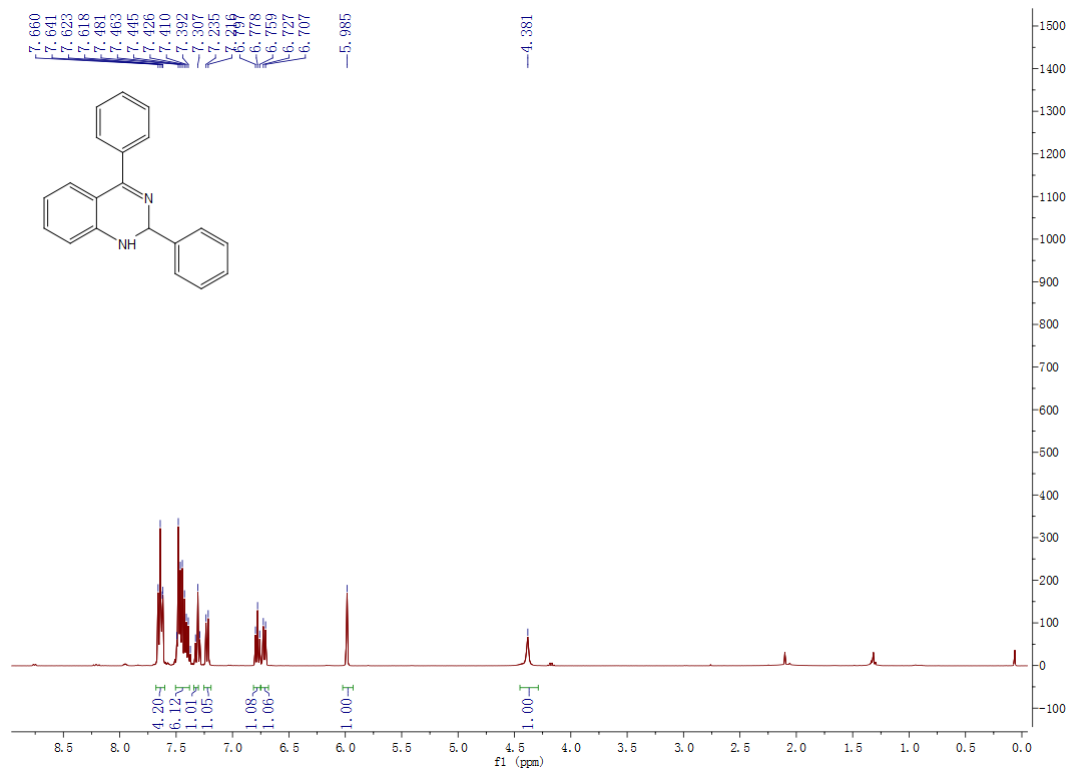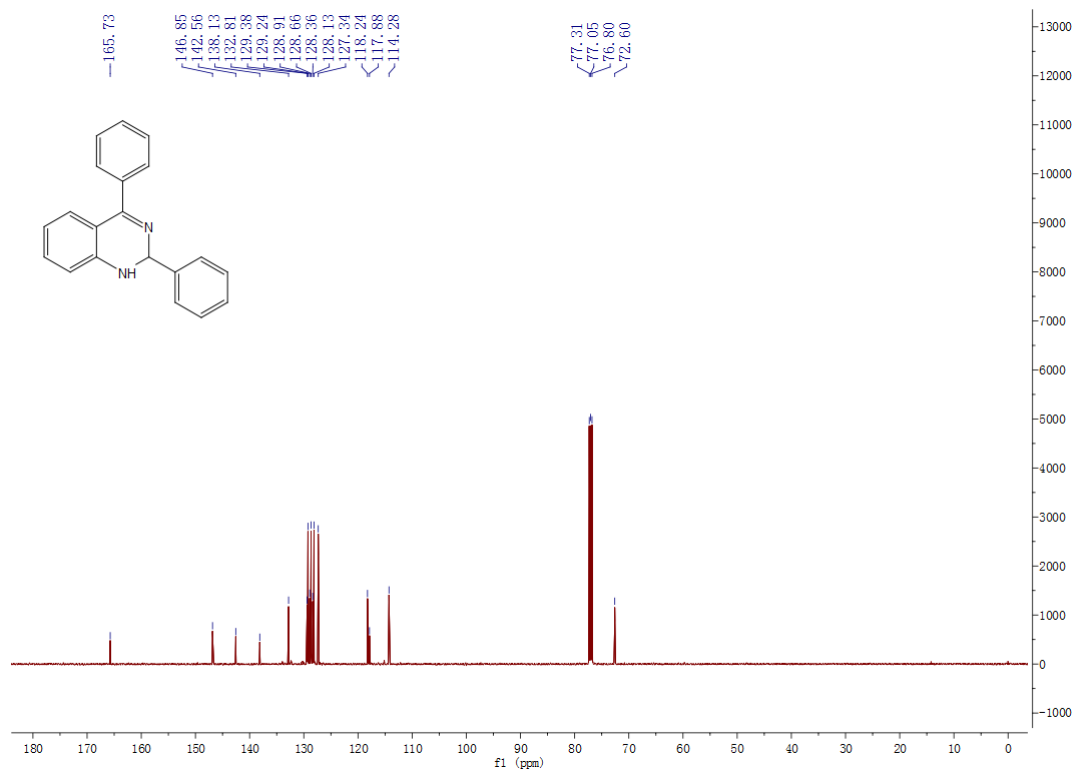

Figure S35. <sup>1</sup>H NMR of **5a** (500 MHz, CDCl<sub>3</sub>) and <sup>13</sup>C NMR of **5a** (125 MHz, CDCl<sub>3</sub>).
